# Supplementary material for: Validity of the International Classification of Diseases, 10th revision discharge diagnosis codes for hyponatraemia in the Danish National Registry of Patients
Source: PubMed Central journal article supplement — BMJ Open. 2014 Apr 23;4(4):e004956. doi: 10.1136/bmjopen-2014-004956 (PMC4010845; doi:10.1136/bmjopen-2014-004956), 2014-04-23
Supplement: bmjopen-2014-004956.draft_revisions.pdf [file bmjopen-2014-004956.draft_revisions.pdf]

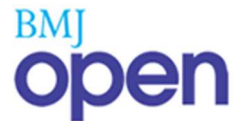

**Validity of the International Classification of Diseases, 10th revision (ICD-10) discharge diagnosis codes for hyponatremia in the Danish National Registry of Patients**

|                                 |                                                                                                                                                                                                                                                                                                                                                                                                                                                                                                                                                                                                              |
|---------------------------------|--------------------------------------------------------------------------------------------------------------------------------------------------------------------------------------------------------------------------------------------------------------------------------------------------------------------------------------------------------------------------------------------------------------------------------------------------------------------------------------------------------------------------------------------------------------------------------------------------------------|
| Journal:                        | <i>BMJ Open</i>                                                                                                                                                                                                                                                                                                                                                                                                                                                                                                                                                                                              |
| Manuscript ID:                  | bmjopen-2014-004956                                                                                                                                                                                                                                                                                                                                                                                                                                                                                                                                                                                          |
| Article Type:                   | Research                                                                                                                                                                                                                                                                                                                                                                                                                                                                                                                                                                                                     |
| Date Submitted by the Author:   | 29-Jan-2014                                                                                                                                                                                                                                                                                                                                                                                                                                                                                                                                                                                                  |
| Complete List of Authors:       | Holland-Bill, Louise; Aarhus University Hospital, Department of Clinical Epidemiology<br>Christiansen, Christian F; Aarhus University Hospital, Dept. of Clinical Epidemiology; Aarhus University Hospital, Department of Clinical Epidemiology<br>Ulrichsen, Sinna; Aarhus University Hospital, Department of Clinical Epidemiology<br>Ring, Troels; Aalborg University Hospital, Department of Nephrology<br>Jørgensen, Jens Otto; Aarhus University Hospital, Department of Endocrinology and Internal Medicine<br>Toft Sørensen, Henrik; Aarhus University Hospital, Department of Clinical Epidemiology |
| <b>Primary Subject Heading</b>: | Epidemiology                                                                                                                                                                                                                                                                                                                                                                                                                                                                                                                                                                                                 |
| Secondary Subject Heading:      | Research methods, Renal medicine, Diabetes and endocrinology                                                                                                                                                                                                                                                                                                                                                                                                                                                                                                                                                 |
| Keywords:                       | EPIDEMIOLOGY, Diabetes & endocrinology < INTERNAL MEDICINE, Nephrology < INTERNAL MEDICINE, GENERAL MEDICINE (see Internal Medicine)                                                                                                                                                                                                                                                                                                                                                                                                                                                                         |
|                                 |                                                                                                                                                                                                                                                                                                                                                                                                                                                                                                                                                                                                              |

SCHOLARONE™  
Manuscripts

# Validity of the International Classification of Diseases, 10<sup>th</sup> revision (ICD-10) discharge diagnosis codes for hyponatremia in the Danish National Registry of Patients

## Authors and affiliations:

Louise Holland-Bill\* MD

Christian Fynbo Christiansen\* MD, PhD

Sinna Pilgaard Ulrichsen\* MSc

Troels Ring# MD

Jens Otto Lunde Jørgensen§ MD, DMSc

Henrik Toft Sørensen\* MD, PhD, DMSc.

\*Department of Clinical Epidemiology, Aarhus University Hospital, Aarhus, Denmark

#Department of Nephrology, Aalborg University Hospital, Aalborg, Denmark

§Department of Endocrinology and Internal Medicine, Aarhus University Hospital, Aarhus, Denmark

## Corresponding author:

Louise Holland-Bill, MD

Department of Clinical Epidemiology, Aarhus University Hospital

Olof Palmes Allé 43-45

8200 Aarhus N, Denmark

E-mail: [louise.bill@dce.au.dk](mailto:louise.bill@dce.au.dk)

Tel: +45 871 68063

Fax: +45 871 67215

**Keywords:** validation study; ICD 10; hyponatremia; diagnosis; population register; clinical laboratory information system

**Word count:** 2,829

## ABSTRACT

**OBJECTIVE:** To examine the validity of the *International Classification of Diseases*, 10<sup>th</sup> revision (ICD-10) codes for hyponatremia in the nationwide population-based Danish National Registry of Patients (DNRP) among inpatients of all ages.

**DESIGN:** Population-based validation study.

**SETTING:** All somatic hospitals in the North and Central Denmark Regions from 2006 through 2011.

**PARTICIPANTS:** Patients of all ages admitted hospital (n=819,701 individual patients) during the study period. Patient could be included in the study more than once, and we did not restrict to patients with serum sodium measurements (total of n=2,186,642 hospitalization).

**MAIN OUTCOME MEASURE:** We validated ICD-10 discharge diagnoses of hyponatremia recorded in the DNRP, using serum sodium measurements obtained from the laboratory information systems (LABKA) research database as gold standard. One sodium value <135 mmol/l measured at any time during hospitalization confirmed the diagnosis. We estimated sensitivity, specificity, positive predictive value (PPV), and negative predictive value (NPV) for ICD-10 codes for hyponatremia overall and for cut-off points for increasing hyponatremia severity.

**RESULT:** An ICD-10 code for hyponatremia was recorded in the DNRP in 5,850 of the 2,186,642 hospitalizations identified. According to laboratory measurements, however, hyponatremia was present in 306,418 (14%) hospitalizations. Sensitivity of hyponatremia diagnoses was 1.8% (95% confidence interval (CI): 1.7%-1.8%). For sodium values <115mmol/l, sensitivity was 34.3% (95% CI: 32.6%-35.9%). Overall PPV was 92.5% (95% CI: 91.8%-93.1%), and decreased with increasing hyponatremia severity. Specificity and NPV were high for all cut-off points ( $\geq 99.8\%$  and  $\geq 86.2\%$  respectively). Hyponatremic patients without a corresponding ICD-10 discharge diagnosis were younger and had higher Charlson Comorbidity Index scores than hyponatremic patients with a hyponatremia code in the DNRP.

1  
2  
3  
4  
5  
6  
7  
8  
9  
10  
11  
12  
13  
14  
15  
16  
17  
18  
19  
20  
21  
22  
23  
24  
25  
26  
27  
28  
29  
30  
31  
32  
33  
34  
35  
36  
37  
38  
39  
40  
41  
42  
43  
44  
45  
46  
47  
48  
49  
50  
51  
52  
53  
54  
55  
56  
57  
58  
59  
60

**CONCLUSION:** ICD-10 codes for hyponatremia in the DNRP have high specificity, but very low sensitivity. Laboratory test results, not discharge diagnoses, should be used to ascertain hyponatremia.

For peer review only

## Article summary

### Article focus

- Hospital discharge diagnoses for hyponatremia recorded in the Danish National Registry of Patients (DNRP) may constitute valuable data sources for epidemiologic studies, however the validity of data must be established.

### Key Message

- ICD-10 coding of hyponatremia in the Danish National Registry of Patients (DNRP) is highly specific but greatly incomplete.
- Epidemiological studies relying on discharge diagnoses of hyponatremia may be susceptible to differential misclassification.

### Strengths and limitation of this study

- This is the first study to validate the International Classification of Diseases, 10th Revision code for hyponatremia in hospitalized patients of all ages.
- We used a population-based design with unambiguous individual-level linkage between registries containing complete data on all hospitalizations and laboratory, ensuring a large sample size and virtually eliminating the risk of selection bias.
- We did not consider the duration of hyponatremia. Sensitivity may have been higher if presence of hyponatremia required, that it was detected in more than one laboratory measurement during hospitalization.

## INTRODUCTION

Hyponatremia, defined as a serum sodium value  $<135\text{mmol/l}$ , is the most common electrolyte abnormality encountered in clinical practice.[1] It can be caused by a large variety of conditions, such as heart failure, kidney failure, cirrhosis, syndrome of inappropriate antidiuretic hormone, vomiting, and diarrhea, and can also be a side effect of several medications.[2] Results of recent studies have indicated that even a mild to moderate level of hyponatremia may be an important predictor of poor prognosis in patients with cardiovascular disease, kidney and liver disease, and cancer.[3-8] However, key aspects of the etiology and prognosis of hyponatremia remain unknown.

The Danish population-based medical registries may offer a unique opportunity for studies of the epidemiology of hyponatremia, if data are valid. However, as symptoms of mild and moderate hyponatremia may be vague, and concealed by or construed as symptoms of an underlying disease, it is likely that the condition will not be reported.[9,10] Thus, use of only inpatient discharge diagnoses of hyponatremia in epidemiologic studies may cause bias that can affect the validity of study results.[11]

To date, only one study has investigated the validity of *International Classification of Diseases* (ICD), 10<sup>th</sup> revision (ICD-10) codes for hyponatremia. This Canadian study was restricted to patients 66 years of age or older presenting with a hyponatremic serum sodium value at time of emergency department contact or at admission.[12] The sensitivity of hyponatremia coding was found to be as low as 7%. For inpatients younger than 66 years, knowledge of the validity hyponatremia diagnoses is limited to a study performed in a single hospital in the Netherlands using ICD-9 codes for hyponatremia. In this study, sensitivity was found to be just below 2%, using hospital laboratory data as the reference standard.[3] Similar results were found in a study examining the validity of outpatient professional ICD-9 claims for hyponatremia in the US.[14]

1  
2  
3  
4 We therefore conducted the first population-based study examining the validity of ICD-10 inpatient  
5 discharge diagnoses of hyponatremia in the Danish National Registry of Patients (DNRP), in terms of  
6 sensitivity, specificity, positive predictive value (PPV), and negative predictive value (NPV), including  
7 patients of all ages.  
8  
9  
10  
11  
12

## 13 14 15 **METHODS**

### 16 17 **Setting and data collection**

18  
19 We used the DNRP to identify all admissions to hospitals in the North and Central Denmark Regions  
20 (2.1 million inhabitants in the study period) from 1 January 2006 to 31 December 2011. The DNRP  
21 contains information, including date of admission and discharge, department code and discharge  
22 diagnoses, on all admissions to Danish non-psychiatric hospitals since 1977.[15,16]  
23  
24  
25

26  
27 By use of the unique 10-digit civil registration number, assigned to all Danish residents since 1968,[17]  
28 we linked each patient's DNRP data to the clinical laboratory information system (LABKA) research  
29 database. For patients living in the North and Central Denmark Regions, data on virtually all  
30 specimens analyzed in clinical laboratories by hospitals and medical practitioners are entered into a  
31 computer-based clinical laboratory information system, which functions as a routine diagnostic tool for  
32 medical personnel.[18] Data are transferred electronically to the LABKA research database, managed  
33 by Aarhus University. Analyses are coded according to the NPU (Nomenclature, Properties and Units)  
34 system. The LABKA research database contains the civil registration number, time and date of blood  
35 sampling, and identification code of the requesting physician or hospital department.[18] We used the  
36 LABKA research database to retrieve information on all serum sodium measurements recorded during  
37 each of the identified hospitalizations.  
38  
39  
40  
41  
42  
43  
44  
45  
46  
47  
48  
49  
50

### 51 52 53 **Hyponatremia diagnosis (ICD-10 code algorithm)**

54  
55  
56  
57  
58  
59  
60

1  
2  
3  
4 At hospital discharge, the attending physician assigns one primary diagnosis, reflecting the main  
5 reason for hospitalization and treatment and up to 19 secondary diagnoses regarding additional  
6 clinically relevant conditions, including underlying diseases, complications and symptoms.[19]

7  
8  
9 Diagnoses recorded in the DNRP have been coded according to the *International Classification of*  
10  
11  
12  
13 *Diseases* (ICD), 10<sup>th</sup> revision (ICD-10) since 1994.[16]

14  
15 We developed an algorithm based on ICD-10 codes to identify discharge diagnoses of hyponatremia  
16 recorded in the DNRP for each hospitalization. The following ICD-10 codes were included in the  
17 algorithm: E87.1 (Hypo-osmolality and hyponatremia), E87.1A (Hyponatremia) and P74.2B  
18 (Hyponatremia in newborns [Danish version of ICD-10]).  
19  
20  
21  
22  
23  
24  
25

### 26 **Gold Standard (laboratory serum sodium measurements)**

27  
28 We used serum sodium measurements recorded in the LABKA research database as the gold  
29 standard to confirm or disconfirm a diagnosis of hyponatremia identified by the ICD-10 algorithm.  
30 Hyponatremia was defined as serum sodium values <135 mmol/l for patients older than 30 days and  
31 <133 mmol/l for infants 30 days of age or younger.[20] Patients were considered to have  
32 hyponatremia if at least one hyponatremic serum sodium value was recorded during their  
33 hospitalization. If no serum sodium measurement was available, the patient was assumed to have a  
34 non-hyponatremic serum sodium value (135-145mmol/l). The following cut-off points for increasing  
35 severity of hyponatremia were chosen: 135 mmol/l, 130mmol/l, 125mmol/l, 120mmol/l and  
36 115mmol/l.[13] The corresponding levels for infants less than 31 days of age were 133mmol/l,  
37 128mmol/l, 123mmol/l, 118mmol/l and 113mmol/l.  
38  
39  
40  
41  
42  
43  
44  
45  
46  
47  
48  
49  
50  
51

### 52 **Other Variables**

53  
54 For each patient, we assessed comorbidity by information retrieved from the DNRP on the conditions  
55 included in the Charlson Comorbidity Index (CCI). The CCI includes 19 medical conditions, each  
56  
57  
58  
59  
60



1  
2  
3  
4 assigned a weighted score between one and six. The sum of these individual scores is used as a  
5  
6 measure of a patient's comorbidity burden.[21, 22] We calculated CCI scores for each patient and  
7  
8 defined three comorbidity levels: low (CCI score 0), medium (CCI score 1-2) and high (CCI score of 3  
9  
10 or above). We included morbidities recorded within 10 years prior to the current hospitalization, as  
11  
12 conditions requiring hospital treatment within this timeframe would likely influence the attending  
13  
14 physician's diagnostic approach and evaluation during the current hospitalization.  
15  
16

17 Furthermore, we obtained information on department of admission and year of admission from the  
18  
19 DNRP. Departments were categorized in the following five groups: internal medicine, surgery,  
20  
21 gynecology/obstetrics, pediatrics, and other.  
22  
23

## 24 25 26 **Statistical analysis**

27  
28 Patients with a hyponatremic serum sodium value recorded in the LABKA research database were  
29  
30 divided into two categories: Those with an ICD-10 code for hyponatremia in the DNRP and those  
31  
32 without. We described both groups of patients in terms of gender, age (median and associated  
33  
34 interquartile range (IQR)), department of admission, CCI score and specific comorbidities.  
35  
36

37 We estimated the sensitivity, specificity, PPV, and NPV (see Figure 1) for ICD-10 codes for  
38  
39 hyponatremia in the DNRP with corresponding 95% confidence intervals (CI), using the exact method  
40  
41 for binomial proportions. We defined sensitivity as the probability an ICD-10 code for hyponatremia  
42  
43 being registered in the DNRP, when the laboratory test result identified presence of hyponatremia.  
44  
45

46 Specificity was defined as the probability of an ICD-10 code for hyponatremia not being registered in  
47  
48 the DNRP, when hyponatremia was not identified in laboratory test results. We estimated the PPV as  
49  
50 the proportion of patients for whom an ICD-10 code for hyponatremia recorded in the DNRP could be  
51  
52 confirmed by a serum sodium measurement, and NPV as the proportion of patients with no ICD-10  
53  
54 code for hyponatremia in the DNRP, for whom non-hyponatremic, or no serum sodium values were  
55  
56  
57  
58  
59  
60

1  
2  
3  
4 recorded in the LABKA research database. The analyses were repeated for all hyponatremia cut-off  
5  
6 points and after stratification by department of admission and admission year.  
7

8  
9 Finally, we conducted three sensitivity analyses. First, we performed a complete case analysis, a  
10  
11 method for dealing with missing data considering only subjects with recorded values for all  
12  
13 covariates,[23] meaning that only patients with at least one serum sodium measurement during their  
14  
15 hospitalization were included in the analysis. We did so, in order to evaluate the assumption that  
16  
17 patients without a serum sodium measurement were normonatremic. In the second sensitivity  
18  
19 analysis, we included only patients with more than one serum sodium measurement during their  
20  
21 hospitalization. In the third sensitivity analysis, we included only the ICD-10 codes E87.1A  
22  
23 (hyponatremia) and P74.2B (hyponatremia in newborns).  
24  
25  
26  
27

28 Data analyses were performed using the statistical software package STATA (version 12; Stata Corp,  
29  
30 College Station, TX, USA).  
31

32 The study was approved by the Danish Data Protection Agency (record number 2006-53-1396).  
33  
34  
35  
36

## 37 RESULTS

### 38 Characteristics

39  
40 We identified 2,186,642 hospitalizations (819,701 individual patients) within the study period. For  
41  
42 1,308,740 (60%) hospitalizations, at least one serum sodium measurement was recorded in the  
43  
44 LABKA research database, and for 1,037,647 (47%) subsequent measurements were recorded.  
45  
46

47 According to the recorded serum sodium value, hyponatremia was present in 306,418 hospitalizations  
48  
49 (14%). In the DNRP, we identified 5,850 hospitalizations with an ICD-10 code of hyponatremia (hypo-  
50  
51 osmolality and hyponatremia= 3,722, hyponatremia=2,124, hyponatremia in newborns=4) among all  
52  
53 2,186,642 hospitalizations. Of these, 440 did not have a hyponatremic serum sodium value recorded  
54  
55 in the LABKA research database.  
56  
57  
58  
59  
60

Table 1 shows the distribution of hospitalizations by presence/absence of an ICD-10 diagnosis of hyponatremia recorded in the DNRP, by gender, age and comorbidity variables, for patients with hyponatremic serum sodium values. Patients who had an ICD-10 code of hyponatremia recorded in the DNRP and a corresponding hyponatremic serum sodium measurement, were on average older, more often female, more likely admitted to an internal medicine department, and characterized by lower comorbidity levels than patients with no hyponatremia diagnosis in the DNRP, but hyponatremic serum sodium values recorded in the LABKA research database. Cerebrovascular disease, dementia, and ulcer disease were the only comorbidities more frequently found in patients with an ICD-10 code for hyponatremia and corresponding hyponatremic serum sodium value, compared to hyponatremic patients without a hyponatremia diagnosis in the DNRP. (Table 1)

**Table 1.**

Characteristics of hospitalizations identified in the DNRP from 2006 to 2011

|                                | Hospitalizations with at least on serum sodium value<br><135 mmol/l recorded in the LABKA research database |                                                                        | All<br>hospitalizations<br>(n=2,186,642)<br>n (%) |
|--------------------------------|-------------------------------------------------------------------------------------------------------------|------------------------------------------------------------------------|---------------------------------------------------|
|                                | ICD-10 code of<br>hyponatremia in the DNRP*<br>(n=5,410)<br>n (%)                                           | No ICD-10 code of<br>hyponatremia in the DNRP*<br>(n=301,008)<br>n (%) |                                                   |
| <b>Sex</b>                     |                                                                                                             |                                                                        |                                                   |
| Female                         | 3,643 (67.3)                                                                                                | 148,120 (49.3)                                                         | 1,168,803 (53.5)                                  |
| Male                           | 1,767 (32.7)                                                                                                | 152,588 (50.7)                                                         | 1,017,839 (46.5)                                  |
| <b>Age, years</b>              |                                                                                                             |                                                                        |                                                   |
| Median (IQR)                   | 77.3 (65.7-84.9)                                                                                            | 67.4 (54.2-78.2)                                                       | 54.7 (29.3-71.1)                                  |
| <b>Department of admission</b> |                                                                                                             |                                                                        |                                                   |
| Internal medicine              | 5,173 (95.6)                                                                                                | 184,848 (61.6)                                                         | 943,121 (43.1)                                    |
| Surgical                       | 184 (3.4)                                                                                                   | 88,378 (29.4)                                                          | 630,525 (28.8)                                    |
| Gynaecologic/obstetric         | 10 (0.2)                                                                                                    | 7,104 (2.4)                                                            | 347,365 (15.9)                                    |
| Pediatric                      | 29 (0.5)                                                                                                    | 15,830 (5.3)                                                           | 165,289 (7.6)                                     |
| Other                          | 14 (0.3)                                                                                                    | 4,848 (1.6)                                                            | 100,342 (4.6)                                     |
| <b>CCI level_(score)</b>       |                                                                                                             |                                                                        |                                                   |
| Low (0)                        | 2,075 (38.4)                                                                                                | 100,398 (33.4)                                                         | 1,232,762 (56.4)                                  |
| Medium (1-2)                   | 2,182 (40.3)                                                                                                | 106,874 (35.5)                                                         | 588,783 (26.9)                                    |
| High (≥3)                      | 1,153 (21.3)                                                                                                | 93,736 (31.1)                                                          | 365,097 (16.7)                                    |

| <b>Specific comorbidities</b>    |              |               |                |
|----------------------------------|--------------|---------------|----------------|
| Myocardial infarction            | 312 (5.8)    | 23,269 (7.7)  | 108,373 (5.0)  |
| Congestive heart failure         | 460 (8.5)    | 31,236 (10.4) | 121,429 (5.6)  |
| Peripheral vascular disease      | 464 (8.6)    | 29,356 (9.8)  | 115,620 (5.3)  |
| Cerebrovascular disease          | 1,017 (18.8) | 39,466 (13.1) | 182,304 (8.3)  |
| Dementia                         | 107 (3.1)    | 4,247 (1.4)   | 20,711 (1.0)   |
| Chronic pulmonary disease        | 870 (16.1)   | 48,726 (16.2) | 231,121 (10.6) |
| Connective tissue disease        | 291 (5.4)    | 13,990 (4.7)  | 73,299 (3.4)   |
| Ulcer disease                    | 450 (8.3)    | 20,645 (6.9)  | 79,050 (3.6)   |
| Mild liver disease               | 189 (3.5)    | 13,413 (4.5)  | 37,698 (1.7)   |
| Moderate to severe liver disease | 66 (1.2)     | 6,279 (2.1)   | 14,999 (0.7)   |
| Diabetes I and II                | 521 (9.6)    | 39,995 (13.3) | 150,205 (6.9)  |
| Diabetes with complications      | 269 (5.0)    | 25,083 (8.3)  | 85,035 (3.9)   |
| Hemiplegia                       | 35 (0.7)     | 2,462 (0.8)   | 16,060 (0.7)   |
| Moderate to severe renal disease | 143 (2.6)    | 20,123 (6.7)  | 75,441 (3.5)   |
| Malignant tumor                  | 781 (14.4)   | 64,882 (21.6) | 312,845 (14.3) |
| Leukemia                         | 22 (0.4)     | 4,636 (1.5)   | 17,190 (0.8)   |
| Lymphoma                         | 51 (0.9)     | 7,096 (2.4)   | 25,348 (1.2)   |
| Metastatic cancer                | 183 (3.4)    | 23,948 (8.0)  | 105,512 (4.8)  |
| AIDS                             | 3 (0.1)      | 475 (0.2)     | 2,014 (0.1)    |

\* DNRP = Danish National Registry of Patients

### **Sensitivity, specificity, PPV and NPV**

For 440 (7.5%) of the 5,850 hospitalizations with an ICD-10 code for hyponatremia recorded in the DNRP, no hyponatremic serum sodium measurement was recorded in the LABKA research database during the hospitalization (for 178, no measurement was recorded at all). This corresponds to a PPV of an ICD-10 code for hyponatremia of 92.5% (95% CI: 91.8%–93.1%) for serum sodium values <135 mmol/l (<133 mmol/l for infants 30 days of age or younger). As expected, PPV decreased with lower serum sodium cut-off points. A total of 5,410 hospitalizations had both an ICD-10 code recorded in the DNRP and a corresponding hyponatremic laboratory measurement, resulting in a sensitivity of the ICD-10 codes of 1.8% (95% CI: 1.7%–1.8%). Sensitivity increased with lower cut-off points for serum sodium, reaching 34.3% (95% CI: 32.6%–35.9%) for serum sodium <115 mmol/l. Specificity and NPV

for serum sodium <135 mmol/l were 100% (97.5% CI: 100%) and 86.2% (95% CI: 86.2%–86.2%), respectively. Specificity and NPV remained high for all serum sodium cut-off points (Table 2).

**Table 2.**

Validity of ICD-10 codes for hyponatremia recorded in the DNRP\*, using serum sodium measurements in the LABKA research database as gold standard.

| Hyponatremic serum sodium value recorded in LABKA research database (mmol/l) | ICD-10 code for hyponatremia recorded in the DNRP* |       |           |                   | Primary Analysis |                                                                                    | Sensitivity Analyses                                                    |                                                                  |                  |
|------------------------------------------------------------------------------|----------------------------------------------------|-------|-----------|-------------------|------------------|------------------------------------------------------------------------------------|-------------------------------------------------------------------------|------------------------------------------------------------------|------------------|
|                                                                              | Yes                                                | No    | Total     | Validity Measures |                  | Requiring at least one serum sodium measurement during hospitalization % (95% CI)] | Requiring >1 serum sodium measurement during hospitalization % (95% CI) | ICD-10 algorithm restricted to code E87.1A and P74.2B % (95% CI) |                  |
|                                                                              |                                                    |       |           | % (95% CI)        |                  |                                                                                    |                                                                         |                                                                  |                  |
| <b>Overall</b>                                                               |                                                    |       |           |                   |                  |                                                                                    |                                                                         |                                                                  |                  |
| Na<135 <sup>□</sup>                                                          | Yes                                                | 5,410 | 301,008   | 306,418           | Sensitivity      | 1.8 (1.7-1.8)                                                                      | 1.8 (1.7-1.8)                                                           | 1.9 (1.8-2.0)                                                    | 0.7 (0.6-0.7)    |
|                                                                              | No                                                 | 440   | 1,879,784 | 1,880,224         | Specificity      | 100 (100-100)                                                                      | 100 (100-100)                                                           | 100 (100-100)                                                    | 100 (100-100)    |
|                                                                              | Total                                              | 5,850 | 2,180,792 | 2,186,642         | PPV              | 92.5 (91.8-93.1)                                                                   | 95.4 (94.8-95.9)                                                        | 95.8 (95.2-96.3)                                                 | 94.6 (93.6-95.6) |
|                                                                              |                                                    |       |           |                   | NPV              | 86.2 (86.2-86.2)                                                                   | 76.9 (76.8-77.0)                                                        | 74.7 (74.6-74.8)                                                 | 86.1 (86.0-86.1) |
| <b>Cut-off points for increasing severity of hyponatremia</b>                |                                                    |       |           |                   |                  |                                                                                    |                                                                         |                                                                  |                  |
| Na<130 <sup>§</sup>                                                          | Yes                                                | 4,528 | 80,605    | 85,133            | Sensitivity      | 5.3 (5.2-5.5)                                                                      | 5.3 (5.2-5.5)                                                           | 5.6 (5.4-5.7)                                                    | 2.1 (2.0-2.2)    |
|                                                                              | No                                                 | 1,322 | 2,100,187 | 2,101,509         | Specificity      | 99.9 (99.9-99.9)                                                                   | 99.9 (99.9-99.9)                                                        | 99.9 (99.9-99.9)                                                 | 100 (100-100)    |
|                                                                              | Total                                              | 5,850 | 2,180,792 | 2,186,642         | PPV              | 77.4 (76.3-78.5)                                                                   | 79.8 (78.7-80.9)                                                        | 80.5 (79.4-81.6)                                                 | 83.0 (81.4-84.6) |
|                                                                              |                                                    |       |           |                   | NPV              | 96.3 (96.3-96.3)                                                                   | 93.8 (93.8-93.9)                                                        | 93.0 (93.0-93.1)                                                 | 96.2 (96.2-96.2) |
| Na<125 <sup>#</sup>                                                          | Yes                                                | 3,261 | 21,544    | 24,805            | Sensitivity      | 13.1 (12.7-13.6)                                                                   | 13.1 (12.7-13.6)                                                        | 13.6 (13.1-14.0)                                                 | 5.4 (5.1-5.7)    |
|                                                                              | No                                                 | 2,589 | 2,159,248 | 2,161,837         | Specificity      | 99.9 (99.9-99.9)                                                                   | 99.8 (99.8-99.8)                                                        | 99.8 (99.8-99.8)                                                 | 100 (100-100)    |
|                                                                              | Total                                              | 5,850 | 2,180,792 | 2,186,642         | PPV              | 55.7 (54.5-57.0)                                                                   | 57.5 (56.2-58.8)                                                        | 57.9 (56.5-59.2)                                                 | 62.5 (60.4-64.5) |
|                                                                              |                                                    |       |           |                   | NPV              | 99.0 (99.0-99.0)                                                                   | 98.3 (98.3-98.4)                                                        | 98.1 (98.1-98.1)                                                 | 98.9 (98.9-98.9) |
| Na<120 <sup>£</sup>                                                          | Yes                                                | 2,061 | 6,219     | 8,280             | Sensitivity      | 24.9 (24.0-25.9)                                                                   | 24.9 (24.0-25.8)                                                        | 25.4 (24.5-26.4)                                                 | 6.3 (5.8-6.9)    |
|                                                                              | No                                                 | 3,789 | 2,174,573 | 2,178,362         | Specificity      | 99.8 (99.8-99.8)                                                                   | 99.7 (99.7-99.7)                                                        | 99.7 (99.7-99.7)                                                 | 100 (100-100)    |
|                                                                              | Total                                              | 5,850 | 2,180,792 | 2,186,642         | PPV              | 35.2 (34.0-36.5)                                                                   | 36.3 (35.1-37.6)                                                        | 36.3 (35.0-37.6)                                                 | 50.6 (47.5-53.7) |
|                                                                              |                                                    |       |           |                   | NPV              | 99.7 (99.7-99.7)                                                                   | 99.5 (99.5-99.5)                                                        | 99.5 (99.4-99.5)                                                 | 99.6 (99.6-99.7) |
| Na<115 <sup>§</sup>                                                          | Yes                                                | 1,107 | 2,127     | 3,234             | Sensitivity      | 34.3 (32.6-35.9)                                                                   | 34.2 (32.6-35.9)                                                        | 34.9 (33.1-36.6)                                                 | 9.3 (8.3-10.3)   |
|                                                                              | No                                                 | 4,743 | 2,178,665 | 2,183,408         | Specificity      | 99.8 (99.8-99.8)                                                                   | 99.7 (99.6-99.7)                                                        | 99.6 (99.6-99.6)                                                 | 100 (100-100)    |
|                                                                              | Total                                              | 5,850 | 2,180,792 | 2,186,642         | PPV              | 18.9 (17.9-20.0)                                                                   | 19.5 (18.5-20.6)                                                        | 19.5 (18.4-20.6)                                                 | 28.8 (26.1-31.7) |
|                                                                              |                                                    |       |           |                   | NPV              | 99.9 (99.9-99.9)                                                                   | 99.8 (99.8-99.8)                                                        | 99.8 (99.8-99.8)                                                 | 99.9 (99.9-99.9) |

\*DNRP = Danish National Registry of Patients

<sup>□</sup> Corresponding to <133 mmol/l for infants of 30 day or less of age

<sup>§</sup> Corresponding to <128 mmol/l for infants of 30 day or less of age

<sup>#</sup> Corresponding to <123 mmol/l for infants of 30 day or less of age

<sup>£</sup> Corresponding to <118 mmol/l for infants of 30 day or less of age

<sup>§</sup> Corresponding to <113 mmol/l for infants of 30 day or less of age

Sensitivity was higher among admissions to internal medicine departments than among admissions to surgical, gynecologic/obstetric, pediatric, and “other” departments (Table 3). The validity measures were virtually unchanged across strata of admission year.

**Table 3.**

Validity of ICD-10 codes for hyponatremia recorded in the DNRP, stratified by year and department of admission, for serum sodium values <135mmol/l<sup>†</sup> and <125mmol/l<sup>#</sup>

|                           | Sensitivity<br>% (95% CI) |                     | Specificity<br>% (95% CI) |                     | PPV<br>% (95% CI)   |                     | NPV<br>% (95% CI)   |                     |
|---------------------------|---------------------------|---------------------|---------------------------|---------------------|---------------------|---------------------|---------------------|---------------------|
|                           | 135 mmol/l                | <125 mmol/l         | <135 mmol/l               | <125 mmol/l         | <135 mmol/l         | <125 mmol/l         | <135 mmol/l         | <125 mmol/l         |
| <b>Admission Year</b>     |                           |                     |                           |                     |                     |                     |                     |                     |
| 2006                      | 1.5<br>(1.4-1.7)          | 12.5<br>(11.5-13.5) | 100<br>(100-100)          | 99.9<br>(99.9-99.9) | 92.8<br>(90.8-94.5) | 66.6<br>(63.2-69.9) | 86.8<br>(86.6-86.9) | 99.0<br>(98.9-99.0) |
| 2007                      | 1.4<br>(1.3-1.5)          | 12.0<br>(11.0-13.1) | 100<br>(100-100)          | 99.9<br>(99.9-99.9) | 94.4<br>(92.4-96.0) | 65.3<br>(61.6-68.8) | 87.0<br>(86.9-87.1) | 99.0<br>(99.0-99.1) |
| 2008                      | 1.7<br>(1.6-1.8)          | 12.3<br>(11.3-13.3) | 100<br>(100-100)          | 99.9<br>(99.9-99.9) | 91.1<br>(89.1-92.8) | 53.6<br>(50.4-56.8) | 85.9<br>(85.8-86.1) | 99.0<br>(98.9-99.0) |
| 2009                      | 1.8<br>(1.7-1.9)          | 12.6<br>(11.6-13.6) | 100<br>(100-100)          | 99.9<br>(99.8-99.9) | 93.4<br>(91.7-94.8) | 51.4<br>(48.4-54.5) | 85.5<br>(85.3-85.6) | 99.0<br>(98.9-99.0) |
| 2010                      | 1.9<br>(1.8-2.0)          | 14.2<br>(13.2-15.4) | 100<br>(100-100)          | 99.9<br>(99.9-99.9) | 91.6<br>(89.8-93.2) | 54.4<br>(51.4-57.4) | 86.3<br>(86.2-86.4) | 99.1<br>(99.0-99.1) |
| 2011                      | 2.2<br>(2.0-2.3)          | 15.2<br>(14.1-16.4) | 100<br>(100-100)          | 99.9<br>(99.9-99.9) | 92.2<br>(90.6-93.6) | 49.8<br>(47.0-52.7) | 85.8<br>(85.7-85.9) | 99.1<br>(99.0-99.1) |
| <b>Department</b>         |                           |                     |                           |                     |                     |                     |                     |                     |
| Internal medicine         | 2.7<br>(2.7-2.8)          | 16.5<br>(16.0-17.0) | 99.9<br>(99.9-100)        | 99.7<br>(99.7-99.7) | 92.8<br>(92.1-93.4) | 56.0<br>(54.7-57.3) | 80.3<br>(80.2-80.4) | 98.3<br>(98.3-98.3) |
| Surgical                  | 0.2<br>(0.2-0.2)          | 2.3<br>(1.9-2.8)    | 100<br>(100-100)          | 100<br>(100-100)    | 90.6<br>(85.8-94.3) | 57.6<br>(50.5-64.5) | 86.0<br>(85.9-86.1) | 99.2<br>(99.2-99.2) |
| Gynecologic/<br>Obstetric | 0.1<br>(0.1-0.3)          | 3.1<br>(1.2-6.7)    | 100<br>(100-100)          | 100<br>(100-100)    | 76.9<br>(46.2-95.0) | 46.2<br>(19.2-74.9) | 98.0<br>(97.9-98.0) | 99.9<br>(99.9-100)  |
| Pediatric                 | 0.2<br>(0.1-0.3)          | 3.4<br>(1.7-5.8)    | 100<br>(100-100)          | 100<br>(100-100)    | 85.3<br>(68.9-95.0) | 35.3<br>(19.7-53.5) | 90.4<br>(90.3-90.6) | 99.8<br>(99.8-99.8) |
| Other                     | 0.3<br>(0.2-0.5)          | 1.5<br>(0.4-3.9)    | 100<br>(100-100)          | 100<br>(100-100)    | 58.3<br>(36.6-77.9) | 16.7<br>(4.74-37.4) | 95.2<br>(95.0-95.3) | 99.7<br>(99.7-99.8) |

\* DNRP = Danish National Registry of Patients

<sup>†</sup>Corresponding to <133mmol/l for infants of 30 day or less of age

<sup>#</sup>Corresponding to <123mmol/l for infants of 30 day or less of age

### Sensitivity analyses

Compared to the primary analyses, we observed no changes in neither sensitivity nor specificity estimates when including only patients with at least one serum sodium measurement during their

1  
2  
3  
4 hospitalization in the analysis. PPV increased slightly for all serum sodium cut-off points, while NPV  
5  
6 decreased for the three highest cut-off points. Including only patients with more than one serum  
7  
8 sodium measurement also yielded almost identical results (Table 2).

9  
10 After restriction to the most specific ICD-10 codes for hyponatremia, PPV increased slightly and  
11  
12 sensitivity decreased (94.6% (95% CI: 93.6%–95.6%) and 0.7% (95% CI: 0.6%–0.7%), respectively).  
13  
14 Estimates of specificity and NPV were virtually unchanged (Table 2).  
15  
16

## 17 18 19 **DISCUSSION**

20  
21 This is the first study to report on the validity of ICD-10 coding of hyponatremia using comprehensive  
22  
23 population-based medical registries, and including patients of all ages. A record of a hyponatremia  
24  
25 diagnosis in the DNRP was found to be specific to and highly predictive of hyponatremia confirmed by  
26  
27 laboratory values. However, the disorder was greatly underreported, though to a lesser extent in  
28  
29 patients admitted to an internal medicine department compared to other departments. We found  
30  
31 sensitivity to be low even for severe degrees of hyponatremia. These results were robust when we  
32  
33 used a stricter definition of hyponatremia and complete case analysis.  
34  
35  
36  
37  
38

39 Our findings correspond with those of Movig *et al.*'s single-center study conducted in The Netherlands,  
40  
41 in which ICD-9-CM coding of hyponatremia in inpatient discharge records was compared with hospital  
42  
43 laboratory data.[13] As in our study, sensitivity at the cut-off point of 135 mmol/l was 1.7%, and  
44  
45 increased with decreasing serum sodium levels. Sensitivity thus reached 30.6% for values below 115  
46  
47 mmol/l. In addition, their estimates for PPV, NPV, and specificity were similar to our results (91.7%,  
48  
49 79.5% and <99.9%, respectively). A Canadian study by Gandhi *et al.* examined ICD-10 coding for  
50  
51 hyponatremia and reported a sensitivity of 4.5% for the cut-off point of <135 mmol/l and 34.4% for the  
52  
53 cut-off point of 125 mmol/l.[12] The study was, however, restricted to patients  $\geq 66$  years of age  
54  
55 presenting with hyponatremic laboratory test result at admission or emergency department contact. In  
56  
57  
58  
59  
60



1  
2  
3  
4 line with their results, we found that the median age of patients with a ICD-10 code of hyponatremia  
5 recorded in the DNRP, which could be confirmed by laboratory results, was higher than that of  
6  
7  
8 hyponatremic patients with no ICD-10 code for hyponatremia recorded in the DNRP. Shea *et al.* also  
9 reported higher sensitivity compared to our results (3.5% for a cut-off point of <136 mmol/l and 29.6%  
10 for the cut-off point of 125 mmol/l) in their study examining the validity of ICD-9 codes of hyponatremia  
11 in an outpatient managed-care population.[14] Outpatient serum sodium laboratory tests were  
12 compared with outpatient professional ICD-9 claims registered within 15 days before or after the  
13 laboratory claim. The PPV was 62.6% for serum sodium levels <136 mmol/l and 10.4% for levels <125  
14 mmol/l. As noted in the paper, detected hyponatremia may be the cause for follow-up visits in an  
15 outpatient setting, without the need for repeat measurements. This could lead to lower PPV compared  
16 to our study and the study by Movig *et al.* In addition, managed-care claims databases encompass an  
17 employer-based commercially insured population. Shea *et al.*'s study thus may not be representative  
18 of elderly populations, in which prevalence of hyponatremia is high.[24, 25] This also may explain why  
19 their results differed from ours.  
20  
21  
22  
23  
24  
25  
26  
27  
28  
29  
30  
31  
32  
33  
34  
35  
36

37 The major strengths of our study are its population-based design and unambiguous individual-level  
38 linkage between registries containing complete data on all hospitalizations and laboratory tests in a  
39 well-defined population. This eliminates the risk of selection bias. Several potential study limitations  
40 must be considered. We relied on only one (the lowest) serum sodium value recorded to define  
41 presence of hyponatremia, and also did not consider duration of hyponatremia. Clinicians may be  
42 more likely to regard hyponatremia as clinically relevant, and hence to include the condition in  
43 discharge diagnoses, if it is detected in more than one measurement. In this context, it is important to  
44 note that patient transfers between departments are registered as separate admissions in the DNRP  
45 and we examined the validity of ICD-10 coding for each registered admission. The PPV may have  
46 been even higher if we had considered contiguous admissions as a single admission. Finally, we  
47  
48  
49  
50  
51  
52  
53  
54  
55  
56  
57  
58  
59  
60



1  
2  
3  
4 chose to include patients without serum sodium measurements and to consider them as  
5  
6 normonatremic in the main analysis. We did so to detect false positive diagnoses and thereby obtain  
7  
8 accurate estimates of predictive values. Serum sodium is often measured as a routine procedure, and  
9  
10 rarely due to specific suspicion. Though frequently measured, the proportion of patients with  
11  
12 unacknowledged hyponatremia is most often unknown. We therefore performed a complete case  
13  
14 analysis, including only patients with serum sodium measurements. As the results did not differ  
15  
16 markedly from those of the primary analysis, we believe that including patients without serum sodium  
17  
18 measurements in the normonatremic group was justified.  
19  
20  
21  
22  
23

24 We can only speculate on reasons for the low sensitivity of the ICD-10 coding of hyponatremia found  
25  
26 in our study. Hyponatremia is mainly considered a part of the clinical picture of underlying diseases. If  
27  
28 hyponatremia is mild or transient, and does not require intervention or specific attention, it may not  
29  
30 warrant documentation. However, even for very severe hyponatremia (<115 mmol/l), which is  
31  
32 potentially fatal and requires immediate intervention, sensitivity was low. Our results suggest that  
33  
34 hyponatremia is not coded in the presence of coexisting illness deemed more important, and that the  
35  
36 fact that hyponatremia may be an important indicator of a poor prognosis is not yet acknowledged.  
37  
38  
39  
40

41 The results of this validation study emphasize the need for caution when relying on ICD-10 codes for  
42  
43 hyponatremia in research. Based on the estimated PPV and specificity, patients with an ICD-10 code  
44  
45 of hyponatremia can safely be assumed to actually have hyponatremia. However, the low sensitivity  
46  
47 renders the ICD-10 codes inappropriate for use in studies examining prevalence, incidence, and  
48  
49 absolute risk, due to a high degree of misclassification. Sensitivity increased with decreasing serum  
50  
51 sodium levels, suggesting that studies using ICD-codes to identify hyponatremia would be based  
52  
53 mainly on severe cases. Furthermore, our results indicate that quality of registration differs according  
54  
55  
56  
57  
58  
59  
60

1  
2  
3  
4 to age, gender, and morbidity status. Hence, studies may be susceptible to differential  
5  
6 misclassification, again resulting in biased results.  
7  
8  
9

## 10 **CONCLUSION**

11  
12 We found that the ICD-10 coding of hyponatremia in DNRP has high specificity but is highly  
13  
14 incomplete, resulting in very low sensitivity. When available, laboratory test results for serum sodium  
15  
16 will more correctly identify patients with hyponatremia.  
17  
18  
19  
20  
21  
22  
23  
24  
25  
26  
27  
28  
29  
30  
31  
32  
33  
34  
35  
36  
37  
38  
39  
40  
41  
42  
43  
44  
45  
46  
47  
48  
49  
50  
51  
52  
53  
54  
55  
56  
57  
58  
59  
60

## Contributors

LHB participated in the design of the study, performed the data analysis, provided interpretation of study results and drafted the manuscript. SPU participated in acquisition and analysis of data. CFC and HTS participated in the design of the study, provided interpretation of study results and helped draft the manuscript. TR and JOLJ contributed with interpretation of study results helped draft the manuscript. All authors read and approved the final manuscript.

## Funding

This work was supported by the Clinical Epidemiology Research Foundation and by the Danish Cancer Society (grant no. R73-A4284-13-S17).

## Competing interests

JOLJ has received an unrestricted research grant and lecture fees from Otsuka Pharma Scandinavia AB. TR has received lecture fees from Otsuka Pharma Scandinavia AB.

LHB, CFC, SPU and HTS are salaried employees of Department of Clinical Epidemiology, Aarhus University Hospital. The Department of Clinical Epidemiology receives funding from companies in the form of research grants to (and administered by) Aarhus University.

None of these grants or fees had any had any leverage on the design, implementation or reporting of the present study.

**Reference list**

1  
2  
3  
4  
5  
6  
7  
8 1 Upadhyay A, Jaber BL, Madias NE. Incidence and prevalence of hyponatremia. *Am J Med*  
9 2006;**119**(Suppl 1):S30-5.

10  
11  
12  
13 2 Rose BD. Clinical physiology of acid-base and electrolyte disorders. 3rd ed. New York: McGraw-Hill  
14 information Services Company 1989.

15  
16  
17  
18 3 Waikar SS, Curhan GC, Brunelli SM. Mortality associated with low serum sodium concentration in  
19 maintenance hemodialysis. *Am J Med* 2011;**124**:77-84.

20  
21  
22  
23 4 Doshi SM, Shah P, Lei X, *et al.* Hyponatremia in hospitalized cancer patients and its impact on  
24 clinical outcomes. *Am J Kidney Dis* 2012;**59**:222-228.

25  
26  
27  
28 5 Goldberg A, Hammerman H, Petcherski S, *et al.* Prognostic importance of hyponatremia in acute  
29 ST-elevation myocardial infarction. *Am J Med* 2004;**117**:242-248.

30  
31  
32  
33 6 Kovesdy CP, Lott EH, Lu JL, *et al.* Hyponatremia, Hypernatremia and Mortality in Patients with  
34 Chronic Kidney Disease with and without Congestive Heart Failure. *Circulation* 2012;**125**:677-684

35  
36  
37  
38 7 Scherz N, Labarere J, Mean M, *et al.* Prognostic importance of hyponatremia in patients with acute  
39 pulmonary embolism. *Am J Respir Crit Care Med* 2010;**182**:1178-1183.

40  
41  
42  
43 8 Wald R, Jaber BL, Price LL, *et al.* Impact of hospital-associated hyponatremia on selected  
44 outcomes. *Arch Intern Med* 2010;**170**:294-302.

45  
46  
47  
48 9 Chawla A, Sterns RH, Nigwekar SU, *et al.* Mortality and serum sodium: do patients die from or with  
49 hyponatremia? *Clin J Am Soc Nephrol* 2011;**6**:960-965.

- 1  
2  
3  
4 10 Marco J, Barba R, Matia P, *et al.* Low prevalence of hyponatremia codification in departments of  
5 internal medicine and its prognostic implications. *Curr Med Res Opin* 2013;**29**:1757-1762  
6  
7  
8  
9  
10 11 Sorensen HT, Sabroe S, Olsen J. A framework for evaluation of secondary data sources for  
11 epidemiological research. *Int J Epidemiol* 1996;**25**:435-442.  
12  
13  
14  
15 12 Gandhi S, Shariff SZ, Fleet JL, *et al.* Validity of the International Classification of Diseases 10th  
16 revision code for hospitalisation with hyponatraemia in elderly patients. *BMJ Open*  
17 2012;**2**:10.1136/bmjopen-2012-001727. Print 2012.  
18  
19  
20  
21  
22  
23 13 Movig KL, Leufkens HG, Lenderink AW, *et al.* Validity of hospital discharge International  
24 Classification of Diseases (ICD) codes for identifying patients with hyponatremia. *J Clin Epidemiol*  
25 2003;**56**:530-535.  
26  
27  
28  
29  
30  
31 14 Shea AM, Curtis LH, Szczech LA, *et al.* Sensitivity of International Classification of Diseases codes  
32 for hyponatremia among commercially insured outpatients in the United States. *BMC Nephrol*  
33 2008;**9**:5.  
34  
35  
36  
37  
38 15 Andersen TF, Madsen M, Jorgensen J, *et al.* The Danish National Hospital Register. A valuable  
39 source of data for modern health sciences. *Dan Med Bull* 1999;**46**:263-268.  
40  
41  
42  
43  
44 16 Lynge E, Sandegaard JL, Rebolj M. The Danish National Patient Register. *Scand J Public Health*  
45 2011;**39**(Suppl 7):30-33.  
46  
47  
48  
49 17 Pedersen CB. The Danish Civil Registration System. *Scand J Public Health* 2011;**39**(Suppl 7):22-  
50 25.  
51  
52  
53  
54  
55  
56  
57  
58  
59  
60

1  
2  
3  
4 18 Grann AF, Erichsen R, Nielsen AG, *et al*. Existing data sources for clinical epidemiology: The  
5 clinical laboratory information system (LABKA) research database at Aarhus University, Denmark. *Clin*  
6  
7  
8  
9 *Epidemiol* 2011;**3**:133-138.

10  
11  
12 19 SSI - Joint Content for Basic Registration of Hospital Patients.

13  
14 <http://www.ssi.dk/Sundhedsdataogit/Indberetning%20og%20patientregistrering/Patientregistrering/Faellesindhold.aspx>  
15  
16 (accessed 18 Dec 2013; updated 9 Dec 2013).

17  
18  
19  
20 20 Laboratory Manual for Hospitals in the North Jutland Region. 2011.

21  
22 <http://www.laboratorievejledning.dk/prog/view.aspx?AfsnitID=103&KapitelID=26&UKapitelID=194>  
23  
24 (accessed 15 Dec 2013; updated 20 Dec 2011).

25  
26  
27  
28 21 Charlson ME, Pompei P, Ales KL, *et al*. A new method of classifying prognostic comorbidity in  
29 longitudinal studies: development and validation. *J Chronic Dis* 1987;**40**:373-383.

30  
31  
32  
33 22 Thygesen SK, Christiansen CF, Christensen S, *et al*. The predictive value of ICD-10 diagnostic  
34 coding used to assess Charlson comorbidity index conditions in the population-based Danish National  
35 Registry of Patients. *BMC Med Res Methodol* 2011;**11**:83.

36  
37  
38  
39  
40 23 Greenland S, Finkle WD. A critical look at methods for handling missing covariates in epidemiologic  
41 regression analyses. *Am J Epidemiol* 1995;**142**:1255-1264.

42  
43  
44  
45  
46 24 Hawkins RC. Age and gender as risk factors for hyponatremia and hypernatremia. *Clin Chim Acta*  
47  
48 2003;**337**:169-172.

49  
50  
51  
52 25 Miller M, Morley JE, Rubenstein LZ. Hyponatremia in a nursing home population. *J Am Geriatr Soc*  
53  
54 1995;**43**:1410-1413.

|                                                                                              |     | ICD-10 code of hyponatremia<br>recorded in the DNRP* |    |
|----------------------------------------------------------------------------------------------|-----|------------------------------------------------------|----|
|                                                                                              |     | Yes                                                  | No |
| Hyponatremic serum<br>sodium value recorded in<br>LABKA research database<br>(gold standard) | Yes | A                                                    | C  |
|                                                                                              | No  | B                                                    | D  |

Validity measures:  
Sensitivity=  $A/(A+C)$   
Specificity=  $D/(B+D)$   
Positive predictive value=  $A/(A+B)$   
Negative predictive value=  $D/(C+D)$

\*DNRP = Danish National Registry of Patients

Figure 1. Schematic 2x2 table and validity measure estimation formulas  
338x190mm (96 x 96 DPI)

review only

**STROBE 2007 (v4) checklist of items to be included in reports of observational studies in epidemiology\***  
**Checklist for cohort, case-control, and cross-sectional studies (combined)**

| Section/Topic             | Item # | Recommendation                                                                                                                                                                                                                                                                                                                                                                                                                                                         | Reported on page # |
|---------------------------|--------|------------------------------------------------------------------------------------------------------------------------------------------------------------------------------------------------------------------------------------------------------------------------------------------------------------------------------------------------------------------------------------------------------------------------------------------------------------------------|--------------------|
| Title and abstract        | 1      | (a) Indicate the study's design with a commonly used term in the title or the abstract                                                                                                                                                                                                                                                                                                                                                                                 | 1                  |
|                           |        | (b) Provide in the abstract an informative and balanced summary of what was done and what was found                                                                                                                                                                                                                                                                                                                                                                    | 2                  |
| <b>Introduction</b>       |        |                                                                                                                                                                                                                                                                                                                                                                                                                                                                        |                    |
| Background/rationale      | 2      | Explain the scientific background and rationale for the investigation being reported                                                                                                                                                                                                                                                                                                                                                                                   | 5                  |
| Objectives                | 3      | State specific objectives, including any pre-specified hypotheses                                                                                                                                                                                                                                                                                                                                                                                                      | 6                  |
| <b>Methods</b>            |        |                                                                                                                                                                                                                                                                                                                                                                                                                                                                        |                    |
| Study design              | 4      | Present key elements of study design early in the paper                                                                                                                                                                                                                                                                                                                                                                                                                | 6                  |
| Setting                   | 5      | Describe the setting, locations, and relevant dates, including periods of recruitment, exposure, follow-up, and data collection                                                                                                                                                                                                                                                                                                                                        | 6                  |
| Participants              | 6      | (a) <i>Cohort study</i> —Give the eligibility criteria, and the sources and methods of selection of participants. Describe methods of follow-up<br><i>Case-control study</i> —Give the eligibility criteria, and the sources and methods of case ascertainment and control selection. Give the rationale for the choice of cases and controls<br><i>Cross-sectional study</i> —Give the eligibility criteria, and the sources and methods of selection of participants | 7                  |
|                           |        | (b) <i>Cohort study</i> —For matched studies, give matching criteria and number of exposed and unexposed<br><i>Case-control study</i> —For matched studies, give matching criteria and the number of controls per case                                                                                                                                                                                                                                                 |                    |
| Variables                 | 7      | Clearly define all outcomes, exposures, predictors, potential confounders, and effect modifiers. Give diagnostic criteria, if applicable                                                                                                                                                                                                                                                                                                                               | 6-8                |
| Data sources/ measurement | 8*     | For each variable of interest, give sources of data and details of methods of assessment (measurement). Describe comparability of assessment methods if there is more than one group                                                                                                                                                                                                                                                                                   | 6-8                |
| Bias                      | 9      | Describe any efforts to address potential sources of bias                                                                                                                                                                                                                                                                                                                                                                                                              | 9                  |
| Study size                | 10     | Explain how the study size was arrived at                                                                                                                                                                                                                                                                                                                                                                                                                              | 6-7                |
| Quantitative variables    | 11     | Explain how quantitative variables were handled in the analyses. If applicable, describe which groupings were chosen and why                                                                                                                                                                                                                                                                                                                                           | 7                  |
| Statistical methods       | 12     | (a) Describe all statistical methods, including those used to control for confounding                                                                                                                                                                                                                                                                                                                                                                                  | 8-9                |
|                           |        | (b) Describe any methods used to examine subgroups and interactions                                                                                                                                                                                                                                                                                                                                                                                                    | 8-9                |
|                           |        | (c) Explain how missing data were addressed                                                                                                                                                                                                                                                                                                                                                                                                                            | 9                  |
|                           |        | (d) <i>Cohort study</i> —If applicable, explain how loss to follow-up was addressed<br><i>Case-control study</i> —If applicable, explain how matching of cases and controls was addressed                                                                                                                                                                                                                                                                              |                    |



|                          |     |                                                                                                                                                                                                              |           |
|--------------------------|-----|--------------------------------------------------------------------------------------------------------------------------------------------------------------------------------------------------------------|-----------|
|                          |     | <i>Cross-sectional study</i> —If applicable, describe analytical methods taking account of sampling strategy                                                                                                 |           |
|                          |     | (e) Describe any sensitivity analyses                                                                                                                                                                        | 9         |
| <b>Results</b>           |     |                                                                                                                                                                                                              |           |
| Participants             | 13* | (a) Report numbers of individuals at each stage of study—eg numbers potentially eligible, examined for eligibility, confirmed eligible, included in the study, completing follow-up, and analysed            | 9         |
|                          |     | (b) Give reasons for non-participation at each stage                                                                                                                                                         | 9         |
|                          |     | (c) Consider use of a flow diagram                                                                                                                                                                           |           |
| Descriptive data         | 14* | (a) Give characteristics of study participants (eg demographic, clinical, social) and information on exposures and potential confounders                                                                     | 10-11     |
|                          |     | (b) Indicate number of participants with missing data for each variable of interest                                                                                                                          | 9         |
|                          |     | (c) <i>Cohort study</i> —Summarise follow-up time (eg, average and total amount)                                                                                                                             |           |
| Outcome data             | 15* | <i>Cohort study</i> —Report numbers of outcome events or summary measures over time                                                                                                                          |           |
|                          |     | <i>Case-control study</i> —Report numbers in each exposure category, or summary measures of exposure                                                                                                         |           |
|                          |     | <i>Cross-sectional study</i> —Report numbers of outcome events or summary measures                                                                                                                           | 9         |
| Main results             | 16  | (a) Give unadjusted estimates and, if applicable, confounder-adjusted estimates and their precision (eg, 95% confidence interval). Make clear which confounders were adjusted for and why they were included | 11-12     |
|                          |     | (b) Report category boundaries when continuous variables were categorized                                                                                                                                    | 11-12     |
|                          |     | (c) If relevant, consider translating estimates of relative risk into absolute risk for a meaningful time period                                                                                             |           |
| Other analyses           | 17  | Report other analyses done—eg analyses of subgroups and interactions, and sensitivity analyses                                                                                                               | 13-14     |
| <b>Discussion</b>        |     |                                                                                                                                                                                                              |           |
| Key results              | 18  | Summarise key results with reference to study objectives                                                                                                                                                     | 14        |
| Limitations              | 19  | Discuss limitations of the study, taking into account sources of potential bias or imprecision. Discuss both direction and magnitude of any potential bias                                                   | 15-16     |
| Interpretation           | 20  | Give a cautious overall interpretation of results considering objectives, limitations, multiplicity of analyses, results from similar studies, and other relevant evidence                                   | 14-15, 16 |
| Generalisability         | 21  | Discuss the generalisability (external validity) of the study results                                                                                                                                        | 15        |
| <b>Other information</b> |     |                                                                                                                                                                                                              |           |
| Funding                  | 22  | Give the source of funding and the role of the funders for the present study and, if applicable, for the original study on which the present article is based                                                | 18        |

\*Give information separately for cases and controls in case-control studies and, if applicable, for exposed and unexposed groups in cohort and cross-sectional studies.

**Note:** An Explanation and Elaboration article discusses each checklist item and gives methodological background and published examples of transparent reporting. The STROBE checklist is best used in conjunction with this article (freely available on the Web sites of PLoS Medicine at <http://www.plosmedicine.org/>, Annals of Internal Medicine at <http://www.annals.org/>, and Epidemiology at <http://www.epidem.com/>). Information on the STROBE Initiative is available at [www.strobe-statement.org](http://www.strobe-statement.org).

# BMJ Open

## Validity of the International Classification of Diseases, 10th revision (ICD-10) discharge diagnosis codes for hyponatremia in the Danish National Registry of Patients

|                                 |                                                                                                                                                                                                                                                                                                                                                                                                                                                                                                                                                  |
|---------------------------------|--------------------------------------------------------------------------------------------------------------------------------------------------------------------------------------------------------------------------------------------------------------------------------------------------------------------------------------------------------------------------------------------------------------------------------------------------------------------------------------------------------------------------------------------------|
| Journal:                        | <i>BMJ Open</i>                                                                                                                                                                                                                                                                                                                                                                                                                                                                                                                                  |
| Manuscript ID:                  | bmjopen-2014-004956.R1                                                                                                                                                                                                                                                                                                                                                                                                                                                                                                                           |
| Article Type:                   | Research                                                                                                                                                                                                                                                                                                                                                                                                                                                                                                                                         |
| Date Submitted by the Author:   | 31-Mar-2014                                                                                                                                                                                                                                                                                                                                                                                                                                                                                                                                      |
| Complete List of Authors:       | Holland-Bill, Louise; Aarhus University Hospital, Department of Clinical Epidemiology<br>Christiansen, Christian F; Aarhus University Hospital, Department of Clinical Epidemiology<br>Ulrichsen, Sinna; Aarhus University Hospital, Department of Clinical Epidemiology<br>Ring, Troels; Aalborg University Hospital, Department of Nephrology<br>Jørgensen, Jens Otto; Aarhus University Hospital, Department of Endocrinology and Internal Medicine<br>Toft Sørensen, Henrik; Aarhus University Hospital, Department of Clinical Epidemiology |
| <b>Primary Subject Heading</b>: | Epidemiology                                                                                                                                                                                                                                                                                                                                                                                                                                                                                                                                     |
| Secondary Subject Heading:      | Epidemiology, Health services research, Diagnostics, Renal medicine                                                                                                                                                                                                                                                                                                                                                                                                                                                                              |
| Keywords:                       | EPIDEMIOLOGY, Nephrology < INTERNAL MEDICINE, STATISTICS & RESEARCH METHODS                                                                                                                                                                                                                                                                                                                                                                                                                                                                      |
|                                 |                                                                                                                                                                                                                                                                                                                                                                                                                                                                                                                                                  |

SCHOLARONE™  
Manuscripts

# Validity of the International Classification of Diseases, 10<sup>th</sup> revision (ICD-10) discharge diagnosis codes for hyponatremia in the Danish National Registry of Patients

## Authors and affiliations:

Louise Holland-Bill\* MD

Christian Fynbo Christiansen\* MD, PhD

Sinna Pilgaard Ulrichsen\* MSc

Troels Ring# MD

Jens Otto Lunde Jørgensen§ MD, DMSc

Henrik Toft Sørensen\* MD, PhD, DMSc.

\*Department of Clinical Epidemiology, Aarhus University Hospital, Aarhus, Denmark

#Department of Nephrology, Aalborg University Hospital, Aalborg, Denmark

§Department of Endocrinology and Internal Medicine, Aarhus University Hospital, Aarhus, Denmark

## Corresponding author:

Louise Holland-Bill, MD

Department of Clinical Epidemiology, Aarhus University Hospital

Olof Palmes Allé 43-45

8200 Aarhus N, Denmark

E-mail: [louise.bill@dce.au.dk](mailto:louise.bill@dce.au.dk)

Tel: +45 871 68063

Fax: +45 871 67215

**Keywords:** validation study; ICD 10; hyponatremia; diagnosis; population register; clinical laboratory information system

**Word count:** 3,005

## ABSTRACT

**OBJECTIVE:** To examine the validity of the *International Classification of Diseases*, 10<sup>th</sup> revision (ICD-10) codes for hyponatremia in the nationwide population-based Danish National Registry of Patients (DNRP) among inpatients of all ages.

**DESIGN:** Population-based validation study.

**SETTING:** All somatic hospitals in the North and Central Denmark Regions from 2006 through 2011.

**PARTICIPANTS:** Patients of all ages admitted to hospital (n=819,701 individual patients) during the study period. Patient could be included in the study more than once, and we did not restrict to patients with serum sodium measurements (total of n=2,186,642 hospitalizations).

**MAIN OUTCOME MEASURE:** We validated ICD-10 discharge diagnoses of hyponatremia recorded in the DNRP, using serum sodium measurements obtained from the laboratory information systems (LABKA) research database as the gold standard. One sodium value <135 mmol/l measured at any time during hospitalization confirmed the diagnosis. We estimated sensitivity, specificity, positive predictive value (PPV), and negative predictive value (NPV) for ICD-10 codes for hyponatremia overall and for cut-off points for increasing hyponatremia severity.

**RESULT:** An ICD-10 code for hyponatremia was recorded in the DNRP in 5,850 of the 2,186,642 hospitalizations identified. According to laboratory measurements, however, hyponatremia was present in 306,418 (14%) hospitalizations. Sensitivity of hyponatremia diagnoses was 1.8% (95% confidence interval (CI): 1.7%-1.8%). For sodium values <115mmol/l, sensitivity was 34.3% (95% CI: 32.6%-35.9%). Overall PPV was 92.5% (95% CI: 91.8%-93.1%), and decreased with increasing hyponatremia severity. Specificity and NPV were high for all cut-off points ( $\geq 99.8\%$  and  $\geq 86.2\%$  respectively). Hyponatremic patients without a corresponding ICD-10 discharge diagnosis were younger and had higher Charlson Comorbidity Index scores than hyponatremic patients with a hyponatremia code in the DNRP.

1  
2  
3  
4  
5  
6  
7  
8  
9  
10  
11  
12  
13  
14  
15  
16  
17  
18  
19  
20  
21  
22  
23  
24  
25  
26  
27  
28  
29  
30  
31  
32  
33  
34  
35  
36  
37  
38  
39  
40  
41  
42  
43  
44  
45  
46  
47  
48  
49  
50  
51  
52  
53  
54  
55  
56  
57  
58  
59  
60

**CONCLUSION:** ICD-10 codes for hyponatremia in the DNRP have high specificity, but very low sensitivity. Laboratory test results, not discharge diagnoses, should be used to ascertain hyponatremia.

For peer review only

## Article summary

### Article focus

- Hospital discharge diagnoses for hyponatremia recorded in the Danish National Registry of Patients (DNRP) may constitute valuable data sources for epidemiologic studies, however the validity of data must be established.

### Key Message

- ICD-10 coding of hyponatremia in the Danish National Registry of Patients (DNRP) is highly specific but greatly incomplete.
- Epidemiological studies relying on discharge diagnoses of hyponatremia may be susceptible to differential misclassification.

### Strengths and limitation of this study

- This is the first study to validate the International Classification of Diseases, 10th Revision code for hyponatremia in hospitalized patients of all ages.
- We used a population-based design with unambiguous individual-level linkage between registries containing complete data on all hospitalizations and laboratory, ensuring a large sample size and virtually eliminating the risk of selection bias.
- We did not consider the duration of hyponatremia. Sensitivity may have been higher if presence of hyponatremia required, that it was detected in more than one laboratory measurement during hospitalization.

## INTRODUCTION

Hyponatremia, defined as a serum sodium value  $<135\text{mmol/l}$ , is the most common electrolyte abnormality encountered in clinical practice.[1] It can be caused by a large variety of conditions, such as heart failure, kidney failure, cirrhosis, syndrome of inappropriate antidiuretic hormone, vomiting, and diarrhea, and can also be a side effect of several medications.[2] Results of recent studies have indicated that even a mild to moderate level of hyponatremia may be an important predictor of poor prognosis in patients with cardiovascular disease, kidney and liver disease, and cancer.[3-8] However, key aspects of the etiology and prognosis of hyponatremia remain unknown.

The Danish population-based medical registries may offer a unique opportunity for studies of the epidemiology of hyponatremia, if data are valid. However, as symptoms of mild and moderate hyponatremia may be vague, and concealed by or construed as symptoms of an underlying disease, it is likely that the condition will not be reported.[9,10] Thus, use of only inpatient discharge diagnoses of hyponatremia in epidemiologic studies may cause bias that can affect the validity of study results.[11]

To date, only one study has investigated the validity of *International Classification of Diseases* (ICD), 10<sup>th</sup> revision (ICD-10) codes for hyponatremia. This Canadian study was restricted to patients 66 years of age or older with serum sodium values at the time of emergency department contact or at hospital admission.[12] The sensitivity of hyponatremia coding was found to be as low as 7%. For inpatients younger than 66 years, knowledge of the validity hyponatremia diagnoses is limited to a study performed in a single hospital in the Netherlands using ICD-9 codes for hyponatremia. In this study, sensitivity was found to be just below 2%, using hospital laboratory data as the reference standard.[13] Similar results were found in a study examining the validity of outpatient professional ICD-9 claims for hyponatremia in the US.[14]

1  
2  
3  
4 We therefore conducted the first population-based study examining the validity of ICD-10 inpatient  
5 discharge diagnoses of hyponatremia in the Danish National Registry of Patients (DNRP), including  
6 patients of all ages.  
7  
8  
9

## 10 11 12 13 **METHODS**

### 14 15 **Setting and data collection**

16  
17 We used the DNRP to identify all admissions to hospitals in the North and Central Denmark Regions  
18 (2.1 million inhabitants in the study period) from 1 January 2006 to 31 December 2011. The DNRP  
19 contains information, including date of admission and discharge, department code and discharge  
20 diagnoses, on all admissions to Danish non-psychiatric hospitals since 1977.[15,16]

21  
22 By use of the unique 10-digit civil registration number, assigned to all Danish residents since 1968,[17]  
23 we linked each patient's DNRP data to the clinical laboratory information system (LABKA) research  
24 database. For patients living in the North and Central Denmark Regions, data on virtually all  
25 specimens analyzed in clinical laboratories by hospitals and medical practitioners are entered into a  
26 computer-based clinical laboratory information system, which functions as a routine diagnostic tool for  
27 medical personnel.[18] Data are transferred electronically to the LABKA research database, managed  
28 by Aarhus University. Analyses are coded according to the NPU (Nomenclature, Properties and Units)  
29 system. The LABKA research database contains the civil registration number, time and date of blood  
30 sampling, and identification code of the requesting physician or hospital department.[18] We used the  
31 LABKA research database to retrieve information on all serum sodium measurements recorded during  
32 each of the identified hospitalizations.  
33  
34  
35  
36  
37  
38  
39  
40  
41  
42  
43  
44  
45  
46  
47  
48  
49  
50  
51

### 52 **Hyponatremia diagnosis (ICD-10 code algorithm)**

53  
54 At hospital discharge, the attending physician assigns one primary diagnosis, reflecting the main  
55 reason for hospitalization and treatment and up to 19 secondary diagnoses regarding additional  
56  
57  
58  
59  
60



1  
2  
3  
4 clinically relevant conditions, including underlying diseases, complications and symptoms.[19]

5  
6 Diagnoses recorded in the DNRP have been coded according to the *International Classification of*  
7  
8  
9 *Diseases* (ICD), 10<sup>th</sup> revision (ICD-10) since 1994.[16]

10  
11 We developed an algorithm based on ICD-10 codes to identify primary and secondary discharge  
12  
13 diagnoses of hyponatremia recorded in the DNRP for each hospitalization. The following ICD-10  
14  
15 codes were included in the algorithm: E87.1 (Hypo-osmolality and hyponatremia), E87.1A  
16  
17 (Hyponatremia) and P74.2B (Hyponatremia in newborns [Danish version of ICD-10]).  
18  
19

### 20 21 22 **Gold Standard (laboratory serum sodium measurements)**

23  
24 We used serum sodium measurements recorded in the LABKA research database as the gold  
25  
26 standard to confirm or disconfirm a diagnosis of hyponatremia identified by the ICD-10 algorithm.

27  
28 Hyponatremia was defined as serum sodium values <135 mmol/l for patients older than 30 days and  
29  
30 <133 mmol/l for infants 30 days of age or younger.[20] Patients were considered to have  
31  
32 hyponatremia if at least one hyponatremic serum sodium value was recorded during their  
33  
34 hospitalization. If no serum sodium measurement was available, the patient was assumed to have a  
35  
36 non-hyponatremic serum sodium value (135-145mmol/l). The following cut-off points for increasing  
37  
38 severity of hyponatremia were chosen: 135 mmol/l, 130mmol/l, 125mmol/l, 120mmol/l and  
39  
40 115mmol/l.[13] The corresponding levels for infants less than 31 days of age were 133mmol/l,  
41  
42 128mmol/l, 123mmol/l, 118mmol/l and 113mmol/l.  
43  
44  
45  
46  
47

### 48 **Other Variables**

49  
50 For each patient, we assessed comorbidity by information retrieved from the DNRP on the conditions  
51  
52 included in the Charlson Comorbidity Index (CCI). The CCI includes 19 medical conditions, each  
53  
54 assigned a weighted score between one and six. The sum of these individual scores is used as a  
55  
56 measure of a patient's comorbidity burden.[21, 22] We calculated CCI scores for each patient and  
57  
58  
59  
60

1  
2  
3  
4 defined three comorbidity levels: low (CCI score 0), medium (CCI score 1-2) and high (CCI score of 3  
5  
6 or above). We included morbidities recorded within 10 years prior to the current hospitalization, as  
7  
8 conditions requiring hospital treatment within this timeframe would likely influence the attending  
9  
10 physician's diagnostic approach and evaluation during the current hospitalization.

11  
12  
13 Furthermore, we obtained information on department of admission and year of admission from the  
14  
15 DNRP. Departments were categorized in the following five groups: internal medicine, surgery,  
16  
17 gynecology/obstetrics, pediatrics, and other.  
18  
19

## 20 21 22 **Statistical analysis**

23  
24 Patients with a hyponatremic serum sodium value recorded in the LABKA research database were  
25  
26 divided into two categories: Those with an ICD-10 code for hyponatremia in the DNRP and those  
27  
28 without. We described both groups of patients in terms of gender, age (median and associated  
29  
30 interquartile range (IQR)), department of admission, CCI score and specific comorbidities.

31  
32 We estimated the sensitivity, specificity, PPV, and NPV (see Figure 1) for ICD-10 codes for  
33  
34 hyponatremia in the DNRP with corresponding 95% confidence intervals (CI), using the exact method  
35  
36 for binomial proportions. We defined sensitivity as the probability an ICD-10 code for hyponatremia  
37  
38 being registered in the DNRP, when the laboratory test result identified presence of hyponatremia.

39  
40 Specificity was defined as the probability of an ICD-10 code for hyponatremia not being registered in  
41  
42 the DNRP, when hyponatremia was not identified in laboratory test results. We estimated the PPV as  
43  
44 the proportion of patients for whom an ICD-10 code for hyponatremia recorded in the DNRP could be  
45  
46 confirmed by a serum sodium measurement, and NPV as the proportion of patients with no ICD-10  
47  
48 code for hyponatremia in the DNRP, for whom non-hyponatremic, or no serum sodium values were  
49  
50 recorded in the LABKA research database. The analyses were repeated for all hyponatremia cut-off  
51  
52 points and after stratification by age group categories, department of admission and admission year.  
53  
54  
55  
56  
57  
58  
59  
60

1  
2  
3  
4 Finally, we conducted four sensitivity analyses. First, we performed a complete case analysis, a  
5 method for dealing with missing data considering only subjects with recorded values for all  
6 covariates,[23] meaning that only patients with at least one serum sodium measurement during their  
7 hospitalization were included in the analysis. We did so, in order to evaluate the assumption that  
8 patients without a serum sodium measurement were normonatremic. In the second sensitivity  
9 analysis, we included only patients with more than one serum sodium measurement during their  
10 hospitalization. In the third sensitivity analysis, we included only the ICD-10 codes E87.1A  
11 (hyponatremia) and P74.2B (hyponatremia in newborns). Because epidemiologic studies often focus  
12 on incident cases, we performed a post-hoc sensitivity analysis in which we restricted to the first  
13 hospitalization for each patient in the study period

14  
15  
16  
17  
18  
19  
20  
21  
22  
23  
24  
25  
26 Data analyses were performed using the statistical software package STATA (version 12; Stata Corp,  
27 College Station, TX, USA).

28  
29  
30  
31  
32  
33  
34  
35  
36  
37  
38  
39  
40  
41  
42  
43  
44  
45  
46  
47  
48  
49  
50  
51  
52  
53  
54  
55  
56  
57  
58  
59  
60  
The study was approved by the Danish Data Protection Agency (record number 2006-53-1396). All  
data were obtained from Danish public registries. According to Danish law their use does require  
informed consent or ethics committee approval.

## RESULTS

### Characteristics

We identified 2,186,642 hospitalizations (819,701 individual patients) within the study period. For  
1,308,740 (60%) hospitalizations, at least one serum sodium measurement was recorded in the  
LABKA research database, and for 1,037,647 (47%) subsequent measurements were recorded.  
According to the recorded serum sodium value, hyponatremia was present in 306,418 hospitalizations  
(14%). In the DNRP, we identified 5,850 hospitalizations with an ICD-10 code of hyponatremia (hypo-  
osmolality and hyponatremia= 3,722, hyponatremia=2,124, hyponatremia in newborns=4) among all

2,186,642 hospitalizations. Of these, 440 did not have a hyponatremic serum sodium value recorded in the LABKA research database.

Table 1 shows the distribution of hospitalizations by presence/absence of an ICD-10 diagnosis of hyponatremia recorded in the DNRP, by gender, age and comorbidity variables, for patients with hyponatremic serum sodium values. Patients who had an ICD-10 code of hyponatremia recorded in the DNRP and a corresponding hyponatremic serum sodium measurement, were on average older, more often female, more likely admitted to an internal medicine department, and characterized by lower comorbidity levels than patients with no hyponatremia diagnosis in the DNRP, but hyponatremic serum sodium values recorded in the LABKA research database. Cerebrovascular disease, dementia, and ulcer disease were the only comorbidities more frequently found in patients with an ICD-10 code for hyponatremia and corresponding hyponatremic serum sodium value, compared to hyponatremic patients without a hyponatremia diagnosis in the DNRP. (Table 1)

**Table 1.**

Characteristics of hospitalizations identified in the DNRP from 2006 to 2011

|                                | Hospitalizations with at least on serum sodium value<br><135 mmol/l recorded in the LABKA research database |                                                                        | All<br>hospitalizations<br>(n=2,186,642)<br>n (%) |
|--------------------------------|-------------------------------------------------------------------------------------------------------------|------------------------------------------------------------------------|---------------------------------------------------|
|                                | ICD-10 code of<br>hyponatremia in the DNRP*<br>(n=5,410)<br>n (%)                                           | No ICD-10 code of<br>hyponatremia in the DNRP*<br>(n=301,008)<br>n (%) |                                                   |
| <b>Sex</b>                     |                                                                                                             |                                                                        |                                                   |
| Female                         | 3,643 (67.3)                                                                                                | 148,120 (49.3)                                                         | 1,168,803 (53.5)                                  |
| Male                           | 1,767 (32.7)                                                                                                | 152,588 (50.7)                                                         | 1,017,839 (46.5)                                  |
| <b>Age, years</b>              |                                                                                                             |                                                                        |                                                   |
| Median (IQR)                   | 77.3 (65.7-84.9)                                                                                            | 67.4 (54.2-78.2)                                                       | 54.7 (29.3-71.1)                                  |
| <b>Department of admission</b> |                                                                                                             |                                                                        |                                                   |
| Internal medicine              | 5,173 (95.6)                                                                                                | 184,848 (61.6)                                                         | 943,121 (43.1)                                    |
| Surgical                       | 184 (3.4)                                                                                                   | 88,378 (29.4)                                                          | 630,525 (28.8)                                    |
| Gynaecologic/obstetric         | 10 (0.2)                                                                                                    | 7,104 (2.4)                                                            | 347,365 (15.9)                                    |
| Pediatric                      | 29 (0.5)                                                                                                    | 15,830 (5.3)                                                           | 165,289 (7.6)                                     |
| Other                          | 14 (0.3)                                                                                                    | 4,848 (1.6)                                                            | 100,342 (4.6)                                     |
| <b>CCI level_(score)</b>       |                                                                                                             |                                                                        |                                                   |

|                                  |              |                |                  |
|----------------------------------|--------------|----------------|------------------|
| Low (0)                          | 2,075 (38.4) | 100,398 (33.4) | 1,232,762 (56.4) |
| Medium (1-2)                     | 2,182 (40.3) | 106,874 (35.5) | 588,783 (26.9)   |
| High (≥3)                        | 1,153 (21.3) | 93,736 (31.1)  | 365,097 (16.7)   |
| <b>Specific comorbidities</b>    |              |                |                  |
| Myocardial infarction            | 312 (5.8)    | 23,269 (7.7)   | 108,373 (5.0)    |
| Congestive heart failure         | 460 (8.5)    | 31,236 (10.4)  | 121,429 (5.6)    |
| Peripheral vascular disease      | 464 (8.6)    | 29,356 (9.8)   | 115,620 (5.3)    |
| Cerebrovascular disease          | 1,017 (18.8) | 39,466 (13.1)  | 182,304 (8.3)    |
| Dementia                         | 107 (3.1)    | 4,247 (1.4)    | 20,711 (1.0)     |
| Chronic pulmonary disease        | 870 (16.1)   | 48,726 (16.2)  | 231,121 (10.6)   |
| Connective tissue disease        | 291 (5.4)    | 13,990 (4.7)   | 73,299 (3.4)     |
| Ulcer disease                    | 450 (8.3)    | 20,645 (6.9)   | 79,050 (3.6)     |
| Mild liver disease               | 189 (3.5)    | 13,413 (4.5)   | 37,698 (1.7)     |
| Moderate to severe liver disease | 66 (1.2)     | 6,279 (2.1)    | 14,999 (0.7)     |
| Diabetes I and II                | 521 (9.6)    | 39,995 (13.3)  | 150,205 (6.9)    |
| Diabetes with complications      | 269 (5.0)    | 25,083 (8.3)   | 85,035 (3.9)     |
| Hemiplegia                       | 35 (0.7)     | 2,462 (0.8)    | 16,060 (0.7)     |
| Moderate to severe renal disease | 143 (2.6)    | 20,123 (6.7)   | 75,441 (3.5)     |
| Malignant tumor                  | 781 (14.4)   | 64,882 (21.6)  | 312,845 (14.3)   |
| Leukemia                         | 22 (0.4)     | 4,636 (1.5)    | 17,190 (0.8)     |
| Lymphoma                         | 51 (0.9)     | 7,096 (2.4)    | 25,348 (1.2)     |
| Metastatic cancer                | 183 (3.4)    | 23,948 (8.0)   | 105,512 (4.8)    |
| AIDS                             | 3 (0.1)      | 475 (0.2)      | 2,014 (0.1)      |

\* DNRP = Danish National Registry of Patients

### Sensitivity, specificity, PPV and NPV

For 440 (7.5%) of the 5,850 hospitalizations with an ICD-10 code for hyponatremia recorded in the DNRP, no hyponatremic serum sodium measurement was recorded in the LABKA research database during the hospitalization (for 178, no measurement was recorded at all). This corresponds to a PPV of an ICD-10 code for hyponatremia of 92.5% (95% CI: 91.8%–93.1%) for serum sodium values <135 mmol/l (<133 mmol/l for infants 30 days of age or younger). As expected, PPV decreased with lower serum sodium cut-off points. A total of 5,410 hospitalizations had both an ICD-10 code recorded in the DNRP and a corresponding hyponatremic laboratory measurement, resulting in a sensitivity of the ICD-10 codes of 1.8% (95% CI: 1.7%–1.8%). Sensitivity increased with lower cut-off points for serum

sodium, reaching 34.3% (95% CI: 32.6%–35.9%) for serum sodium <115 mmol/l. Specificity and NPV for serum sodium <135 mmol/l were 100% (97.5% CI: 100%) and 86.2% (95% CI: 86.2%–86.2%), respectively. Specificity and NPV remained high for all serum sodium cut-off points (Table 2).

**Table 2.**

Validity of ICD-10 codes for hyponatremia recorded in the DNRP\*, using serum sodium measurements in the LABKA research database as gold standard.

| Hyponatremic serum sodium value recorded in LABKA research database (mmol/l) |       | ICD-10 code for hyponatremia recorded in the DNRP* |           |           | Validity Measures % (95% CI) |                  |
|------------------------------------------------------------------------------|-------|----------------------------------------------------|-----------|-----------|------------------------------|------------------|
|                                                                              |       | Yes                                                | No        | Total     |                              |                  |
| <b>Overall</b>                                                               |       |                                                    |           |           |                              |                  |
| Na<135 <sup>□</sup>                                                          | Yes   | 5,410                                              | 301,008   | 306,418   | Sensitivity                  | 1.8 (1.7-1.8)    |
|                                                                              | No    | 440                                                | 1,879,784 | 1,880,224 | Specificity                  | 100 (100-100)    |
|                                                                              | Total | 5,850                                              | 2,180,792 | 2,186,642 | PPV                          | 92.5 (91.8-93.1) |
|                                                                              |       |                                                    |           |           | NPV                          | 86.2 (86.2-86.2) |
| <b>Cut-off points for increasing severity of hyponatremia</b>                |       |                                                    |           |           |                              |                  |
| Na<130 <sup>§</sup>                                                          | Yes   | 4,528                                              | 80,605    | 85,133    | Sensitivity                  | 5.3 (5.2-5.5)    |
|                                                                              | No    | 1,322                                              | 2,100,187 | 2,101,509 | Specificity                  | 99.9 (99.9-99.9) |
|                                                                              | Total | 5,850                                              | 2,180,792 | 2,186,642 | PPV                          | 77.4 (76.3-78.5) |
|                                                                              |       |                                                    |           |           | NPV                          | 96.3 (96.3-96.3) |
| Na<125 <sup>#</sup>                                                          | Yes   | 3,261                                              | 21,544    | 24,805    | Sensitivity                  | 13.1 (12.7-13.6) |
|                                                                              | No    | 2,589                                              | 2,159,248 | 2,161,837 | Specificity                  | 99.9 (99.9-99.9) |
|                                                                              | Total | 5,850                                              | 2,180,792 | 2,186,642 | PPV                          | 55.7 (54.5-57.0) |
|                                                                              |       |                                                    |           |           | NPV                          | 99.0 (99.0-99.0) |
| Na<120 <sup>£</sup>                                                          | Yes   | 2,061                                              | 6,219     | 8,280     | Sensitivity                  | 24.9 (24.0-25.9) |
|                                                                              | No    | 3,789                                              | 2,174,573 | 2,178,362 | Specificity                  | 99.8 (99.8-99.8) |
|                                                                              | Total | 5,850                                              | 2,180,792 | 2,186,642 | PPV                          | 35.2 (34.0-36.5) |
|                                                                              |       |                                                    |           |           | NPV                          | 99.7 (99.7-99.7) |
| Na<115 <sup>§</sup>                                                          | Yes   | 1,107                                              | 2,127     | 3,234     | Sensitivity                  | 34.3 (32.6-35.9) |
|                                                                              | No    | 4,743                                              | 2,178,665 | 2,183,408 | Specificity                  | 99.8 (99.8-99.8) |
|                                                                              | Total | 5,850                                              | 2,180,792 | 2,186,642 | PPV                          | 18.9 (17.9-20.0) |
|                                                                              |       |                                                    |           |           | NPV                          | 99.9 (99.9-99.9) |

\*DNRP = Danish National Registry of Patients

<sup>□</sup> Corresponding to <133 mmol/l for infants of 30 day or less of age

<sup>§</sup> Corresponding to <128 mmol/l for infants of 30 day or less of age

<sup>#</sup> Corresponding to <123 mmol/l for infants of 30 day or less of age

<sup>£</sup> Corresponding to <118 mmol/l for infants of 30 day or less of age

<sup>§</sup> Corresponding to <113 mmol/l for infants of 30 day or less of age

Sensitivity was higher among admissions to internal medicine departments than among admissions to surgical, gynecologic/obstetric, pediatric, and “other” departments (Table 3). The validity measures were virtually unchanged across strata of admission year.

**Table 3.**

Validity of ICD-10 codes for hyponatremia recorded in the DNRP, stratified by age group categories, year and department of admission, for serum sodium values <135mmol/l<sup>a</sup> and <125mmol/l<sup>#</sup>

|                           | Sensitivity<br>% (95% CI) |                     | Specificity<br>% (95% CI) |                     | PPV<br>% (95% CI)   |                     | NPV<br>% (95% CI)   |                     |
|---------------------------|---------------------------|---------------------|---------------------------|---------------------|---------------------|---------------------|---------------------|---------------------|
|                           | 135 mmol/l                | <125 mmol/l         | <135 mmol/l               | <125 mmol/l         | <135 mmol/l         | <125 mmol/l         | <135 mmol/l         | <125 mmol/l         |
| <b>Age, years</b>         |                           |                     |                           |                     |                     |                     |                     |                     |
| < 15                      | 0.2<br>(0.1-0.2)          | 3.0<br>(1.5-5.2)    | 100<br>(100-100)          | 100<br>(100-100)    | 84.4<br>(67.2-94.7) | 34.4<br>(18.6-53.2) | 94.6<br>(94.6-94.7) | 99.9<br>(99.9-99.9) |
| 15-34                     | 0.2<br>(0.2-0.3)          | 4.7<br>(3.0-6.9)    | 100<br>(100-100)          | 100<br>(100-100)    | 80.0<br>(65.4-90.4) | 51.1<br>(35.8-66.3) | 95.5<br>(95.4-95.5) | 99.9<br>(99.9-99.9) |
| 35-49                     | 0.9<br>(0.8-1.0)          | 7.8<br>(6.7-9.0)    | 100<br>(100-100)          | 100<br>(100-100)    | 91.3<br>(87.3-94.4) | 67.2<br>(61.2-72.8) | 90.8<br>(90.7-90.9) | 99.3<br>(99.3-99.3) |
| 50-64                     | 1.3<br>(1.3-1.4)          | 9.6<br>(8.9-10.3)   | 100<br>(100-100)          | 99.9<br>(99.9-99.9) | 93.9<br>(92.2-95.3) | 69.6<br>(66.7-72.3) | 83.6<br>(83.5-83.7) | 98.5<br>(98.4-98.5) |
| 65-79                     | 1.8<br>(1.7-1.9)          | 13.6<br>(12.9-14.4) | 100<br>(100-100)          | 99.8<br>(99.8-99.8) | 92.9<br>(91.7-94.0) | 57.2<br>(55.0-59.3) | 79.1<br>(78.9-79.2) | 98.5<br>(98.4-98.5) |
| ≥80                       | 3.4<br>(3.3-3.6)          | 21.0<br>(19.9-22.1) | 99.9<br>(99.9-99.9)       | 99.5<br>(99.5-99.5) | 92.0<br>(90.8-93.0) | 47.7<br>(45.7-49.7) | 75.7<br>(75.5-75.9) | 98.3<br>(98.3-98.4) |
| <b>Admission Year</b>     |                           |                     |                           |                     |                     |                     |                     |                     |
| 2006                      | 1.5<br>(1.4-1.7)          | 12.5<br>(11.5-13.5) | 100<br>(100-100)          | 99.9<br>(99.9-99.9) | 92.8<br>(90.8-94.5) | 66.6<br>(63.2-69.9) | 86.8<br>(86.6-86.9) | 99.0<br>(98.9-99.0) |
| 2007                      | 1.4<br>(1.3-1.5)          | 12.0<br>(11.0-13.1) | 100<br>(100-100)          | 99.9<br>(99.9-99.9) | 94.4<br>(92.4-96.0) | 65.3<br>(61.6-68.8) | 87.0<br>(86.9-87.1) | 99.0<br>(99.0-99.1) |
| 2008                      | 1.7<br>(1.6-1.8)          | 12.3<br>(11.3-13.3) | 100<br>(100-100)          | 99.9<br>(99.9-99.9) | 91.1<br>(89.1-92.8) | 53.6<br>(50.4-56.8) | 85.9<br>(85.8-86.1) | 99.0<br>(98.9-99.0) |
| 2009                      | 1.8<br>(1.7-1.9)          | 12.6<br>(11.6-13.6) | 100<br>(100-100)          | 99.9<br>(99.8-99.9) | 93.4<br>(91.7-94.8) | 51.4<br>(48.4-54.5) | 85.5<br>(85.3-85.6) | 99.0<br>(98.9-99.0) |
| 2010                      | 1.9<br>(1.8-2.0)          | 14.2<br>(13.2-15.4) | 100<br>(100-100)          | 99.9<br>(99.9-99.9) | 91.6<br>(89.8-93.2) | 54.4<br>(51.4-57.4) | 86.3<br>(86.2-86.4) | 99.1<br>(99.0-99.1) |
| 2011                      | 2.2<br>(2.0-2.3)          | 15.2<br>(14.1-16.4) | 100<br>(100-100)          | 99.9<br>(99.9-99.9) | 92.2<br>(90.6-93.6) | 49.8<br>(47.0-52.7) | 85.8<br>(85.7-85.9) | 99.1<br>(99.0-99.1) |
| <b>Department</b>         |                           |                     |                           |                     |                     |                     |                     |                     |
| Internal medicine         | 2.7<br>(2.7-2.8)          | 16.5<br>(16.0-17.0) | 99.9<br>(99.9-100)        | 99.7<br>(99.7-99.7) | 92.8<br>(92.1-93.4) | 56.0<br>(54.7-57.3) | 80.3<br>(80.2-80.4) | 98.3<br>(98.3-98.3) |
| Surgical                  | 0.2<br>(0.2-0.2)          | 2.3<br>(1.9-2.8)    | 100<br>(100-100)          | 100<br>(100-100)    | 90.6<br>(85.8-94.3) | 57.6<br>(50.5-64.5) | 86.0<br>(85.9-86.1) | 99.2<br>(99.2-99.2) |
| Gynecologic/<br>Obstetric | 0.1<br>(0.1-0.3)          | 3.1<br>(1.2-6.7)    | 100<br>(100-100)          | 100<br>(100-100)    | 76.9<br>(46.2-95.0) | 46.2<br>(19.2-74.9) | 98.0<br>(97.9-98.0) | 99.9<br>(99.9-100)  |
| Pediatric                 | 0.2<br>(0.1-0.3)          | 3.4<br>(1.7-5.8)    | 100<br>(100-100)          | 100<br>(100-100)    | 85.3<br>(68.9-95.0) | 35.3<br>(19.7-53.5) | 90.4<br>(90.3-90.6) | 99.8<br>(99.8-99.8) |
| Other                     | 0.3<br>(0.2-0.5)          | 1.5<br>(0.4-3.9)    | 100<br>(100-100)          | 100<br>(100-100)    | 58.3<br>(36.6-77.9) | 16.7<br>(4.74-37.4) | 95.2<br>(95.0-95.3) | 99.7<br>(99.7-99.8) |

\* DNRP = Danish National Registry of Patients

<sup>a</sup>Corresponding to <133mmol/l for infants of 30 day or less of age

<sup>#</sup>Corresponding to <123mmol/l for infants of 30 day or less of age



## Sensitivity analyses

Compared to the primary analyses, we observed no changes in neither sensitivity nor specificity estimates, when including only patients with at least one serum sodium measurement during their hospitalization in the analysis. PPV increased slightly for all serum sodium cut-off points, while NPV decreased for the three highest cut-off points. Including only patients with more than one serum sodium measurement also yielded almost identical results (Table 4).

After restriction to the most specific ICD-10 codes for hyponatremia, PPV increased slightly and sensitivity decreased (94.6% (95% CI: 93.6%–95.6%) and 0.7% (95% CI: 0.6%–0.7%), respectively).

Estimates of specificity and NPV were virtually unchanged (Table 4).

We observed a slight increase in sensitivity for serum sodium cut-off points <130 mmol/l but not for the overall estimate when restricting to the first hospitalization in the study period. PPV and NPV generally increased, although only very slightly for the overall estimate (Table 4).

**Table 4.**

Sensitivity Analyses.

| Hyponatremic serum sodium value recorded in LABKA research database (mmol/l) | Primary Analysis (including all admissions for all patients in the study period)<br>% (95% CI) | Sensitivity Analyses                                                                 |                                                                            |                                                                     |                                                                              |                  |
|------------------------------------------------------------------------------|------------------------------------------------------------------------------------------------|--------------------------------------------------------------------------------------|----------------------------------------------------------------------------|---------------------------------------------------------------------|------------------------------------------------------------------------------|------------------|
|                                                                              |                                                                                                | Requiring at least one serum sodium measurement during hospitalization<br>% (95% CI) | Requiring >1 serum sodium measurement during hospitalization<br>% (95% CI) | ICD-10 algorithm restricted to code E87.1A and P74.2B<br>% (95% CI) | Restricting to first admission per patient in the study period<br>% (95% CI) |                  |
| <b>Overall</b>                                                               |                                                                                                |                                                                                      |                                                                            |                                                                     |                                                                              |                  |
|                                                                              | Sensitivity                                                                                    | 1.8 (1.7-1.8)                                                                        | 1.8 (1.7-1.8)                                                              | 1.9 (1.8-2.0)                                                       | 0.7 (0.6-0.7)                                                                | 1.7(1.7-1.9)     |
|                                                                              | Specificity                                                                                    | 100 (100-100)                                                                        | 100 (100-100)                                                              | 100 (100-100)                                                       | 100 (100-100)                                                                | 100 (100-100)    |
| Na<135                                                                       | PPV                                                                                            | 92.5 (91.8-93.1)                                                                     | 95.4 (94.8-95.9)                                                           | 95.8 (95.2-96.3)                                                    | 94.6 (93.6-95.6)                                                             | 93.5 (92.0-94.7) |
|                                                                              | NPV                                                                                            | 86.2 (86.2-86.2)                                                                     | 76.9 (76.8-77.0)                                                           | 74.7 (74.6-74.8)                                                    | 86.1 (86.0-86.1)                                                             | 91.6 (91.6-91.7) |
| <b>Cut-off points for increasing severity of hyponatremia</b>                |                                                                                                |                                                                                      |                                                                            |                                                                     |                                                                              |                  |
|                                                                              | Sensitivity                                                                                    | 5.3 (5.2-5.5)                                                                        | 5.3 (5.2-5.5)                                                              | 5.6 (5.4-5.7)                                                       | 2.1 (2.0-2.2)                                                                | 6.3 (5.9-6.7)    |
| Na<130                                                                       | Specificity                                                                                    | 99.9 (99.9-99.9)                                                                     | 99.9 (99.9-99.9)                                                           | 99.9 (99.9-99.9)                                                    | 100 (100-100)                                                                | 100 (100-100)    |
|                                                                              | PPV                                                                                            | 77.4 (76.3-78.5)                                                                     | 79.8 (78.7-80.9)                                                           | 80.5 (79.4-81.6)                                                    | 83.0 (81.4-84.6)                                                             | 82.2 (80.7-84.8) |
|                                                                              | NPV                                                                                            | 96.3 (96.3-96.3)                                                                     | 93.8 (93.8-93.9)                                                           | 93.0 (93.0-93.1)                                                    | 96.2 (96.2-96.2)                                                             | 97.9 (97.9-98.0) |



|        |             |                  |                  |                  |                  |                  |
|--------|-------------|------------------|------------------|------------------|------------------|------------------|
|        | Sensitivity | 13.1 (12.7-13.6) | 13.1 (12.7-13.6) | 13.6 (13.1-14.0) | 5.4 (5.1-5.7)    | 15.6 (14.6-16.6) |
|        | Specificity | 99.9 (99.9-99.9) | 99.8 (99.8-99.8) | 99.8 (99.8-99.8) | 100 (100-100)    | 99.9 (99.9-99.9) |
| Na<125 | PPV         | 55.7 (54.5-57.0) | 57.5 (56.2-58.8) | 57.9 (56.5-59.2) | 62.5 (60.4-64.5) | 62.3 (59.6-64.8) |
|        | NPV         | 99.0 (99.0-99.0) | 98.3 (98.3-98.4) | 98.1 (98.1-98.1) | 98.9 (98.9-98.9) | 99.4 (99.4-99.4) |
|        | Sensitivity | 24.9 (24.0-25.9) | 24.9 (24.0-25.8) | 25.4 (24.5-26.4) | 6.3 (5.8-6.9)    | 29.3 (27.3-31.3) |
|        | Specificity | 99.8 (99.8-99.8) | 99.7 (99.7-99.7) | 99.7 (99.7-99.7) | 100 (100-100)    | 99.9 (99.9-99.9) |
| Na<120 | PPV         | 35.2 (34.0-36.5) | 36.3 (35.1-37.6) | 36.3 (35.0-37.6) | 50.6 (47.5-53.7) | 43.7 (41.0-46.4) |
|        | NPV         | 99.7 (99.7-99.7) | 99.5 (99.5-99.5) | 99.5 (99.4-99.5) | 99.6 (99.6-99.7) | 99.8 (99.8-99.8) |
|        | Sensitivity | 34.3 (32.6-35.9) | 34.2 (32.6-35.9) | 34.9 (33.1-36.6) | 9.3 (8.3-10.3)   | 38.8 (35.5-42.1) |
|        | Specificity | 99.8 (99.8-99.8) | 99.7 (99.6-99.7) | 99.6 (99.6-99.6) | 100 (100-100)    | 99.9 (99.9-99.9) |
| Na<115 | PPV         | 18.9 (17.9-20.0) | 19.5 (18.5-20.6) | 19.5 (18.4-20.6) | 28.8 (26.1-31.7) | 24.2 (22.0-26.6) |
|        | NPV         | 99.9 (99.9-99.9) | 99.8 (99.8-99.8) | 99.8 (99.8-99.8) | 99.9 (99.9-99.9) | 99.9 (99.9-99.9) |

## DISCUSSION

This is the first study to report on the validity of ICD-10 coding of hyponatremia using comprehensive population-based medical registries, and including patients of all ages. A record of a hyponatremia diagnosis in the DNRP was found to be specific to and highly predictive of hyponatremia confirmed by laboratory values. However, the disorder was greatly underreported, though to a lesser extent in patients admitted to an internal medicine department compared to other departments. We found sensitivity to be low even for severe degrees of hyponatremia. These results were robust when we used a stricter definition of hyponatremia and complete case analysis.

Our findings correspond with those of Movig *et al.*'s single-center study conducted in The Netherlands, in which ICD-9-CM coding of hyponatremia in inpatient discharge records was compared with hospital laboratory data.[13] As in our study, sensitivity at the cut-off point of 135 mmol/l was 1.7%, and increased with decreasing serum sodium levels. Sensitivity thus reached 30.6% for values below 115 mmol/l. In addition, their estimates for PPV, NPV, and specificity were similar to our results (91.7%, 79.5% and <99.9%, respectively). A Canadian study by Gandhi *et al.* examined ICD-10 coding for hyponatremia and reported a sensitivity of 6.4% for the cut-off point of <135 mmol/l and 41.7% for the cut-off point of 125 mmol/l.[12] The study was, however, restricted to patients  $\geq 66$  years of age presenting with serum sodium values at time of admission or emergency department contact. In line

1  
2  
3  
4 with their results, we found that the median age of patients with an ICD-10 code of hyponatremia  
5 recorded in the DNRP, which could be confirmed by laboratory results, was higher than that of  
6  
7  
8 hyponatremic patients with no ICD-10 code for hyponatremia recorded in the DNRP. However, the  
9  
10 sensitivity estimates did not reach those found by Gandhi *et al.* even for patients 65-79 and  $\geq 80$  years  
11  
12 of age. Shea *et al.* also reported higher sensitivity compared to our results (3.5% for a cut-off point of  
13  
14  $<136$  mmol/l and 29.6% for the cut-off point of 125 mmol/l) in their study examining the validity of ICD-  
15  
16 9 codes of hyponatremia in an outpatient managed-care population.[14] Outpatient serum sodium  
17  
18 laboratory tests were compared with outpatient professional ICD-9 claims registered within 15 days  
19  
20 before or after the laboratory claim. The PPV was 62.6% for serum sodium levels  $<136$  mmol/l and  
21  
22 10.4% for levels  $<125$  mmol/l. As noted in the paper, detected hyponatremia may be the cause for  
23  
24 follow-up visits in an outpatient setting, without the need for repeat measurements. This could lead to  
25  
26 lower PPV compared to our study and the study by Movig *et al.* In addition, managed-care claims  
27  
28 databases encompass an employer-based commercially insured population. Shea *et al.*'s study thus  
29  
30 may not be representative of elderly populations, in which prevalence of hyponatremia is high.[24, 25]  
31  
32 This also may explain why their results differed from ours.  
33  
34  
35  
36  
37  
38

39 The major strengths of our study are its population-based design and unambiguous individual-level  
40  
41 linkage between registries containing complete data on all hospitalizations and laboratory tests in a  
42  
43 well-defined population. This eliminates the risk of selection bias. Several potential study limitations  
44  
45 must be considered. We relied on only one (the lowest) serum sodium value recorded to define  
46  
47 presence of hyponatremia, and also did not consider duration of hyponatremia. Clinicians may be  
48  
49 more likely to regard hyponatremia as clinically relevant, and hence to include the condition in  
50  
51 discharge diagnoses, if it is detected in more than one measurement. In this context, it is important to  
52  
53 note that patient transfers between departments are registered as separate admissions in the DNRP  
54  
55 and we examined the validity of ICD-10 coding for each registered admission. The PPV may have  
56  
57  
58  
59  
60

1  
2  
3  
4 been even higher if we had considered contiguous admissions as a single admission. Finally, we  
5  
6 chose to include patients without serum sodium measurements and to consider them as  
7  
8 normonatremic in the main analysis. We did so to detect false positive diagnoses and thereby obtain  
9  
10 accurate estimates of predictive values. Serum sodium is often measured as a routine procedure, and  
11  
12 rarely due to specific suspicion. Though frequently measured, the proportion of patients with  
13  
14 unacknowledged hyponatremia is most often unknown. We therefore performed a complete case  
15  
16 analysis, including only patients with serum sodium measurements. As the results did not differ  
17  
18 markedly from those of the primary analysis, we believe that including patients without serum sodium  
19  
20 measurements in the normonatremic group was justified.  
21  
22  
23

24  
25  
26 We can only speculate on reasons for the low sensitivity of the ICD-10 coding of hyponatremia found  
27  
28 in our study. A diagnosis of hyponatremia was less likely recorded in patients with high levels of  
29  
30 comorbidity, which may indicate that hyponatremia is mainly considered a bystander of the underlying  
31  
32 diseases. If hyponatremia is mild or transient, and does not require intervention or specific attention, it  
33  
34 may not warrant documentation. However, even for very severe hyponatremia (<115 mmol/l), which is  
35  
36 potentially fatal and requires immediate intervention, sensitivity was low. We believe that this most  
37  
38 likely reflects negligence of proper coding practice rather than lack of attention to the clinical  
39  
40 importance of low serum sodium levels. With the increasing use of electronic medical records it would  
41  
42 be feasible and worthwhile to automatically assign discharge diagnoses to patients with gross  
43  
44 abnormal laboratory values. However, the ultimate responsibility for summarizing the most important  
45  
46 reasons for treatment and care still rests upon the discharging physician. Our results suggest that  
47  
48 hyponatremia is not coded in the presence of coexisting illness deemed more important, and that the  
49  
50 fact that hyponatremia may be an important indicator of a poor prognosis is not yet acknowledged.  
51  
52  
53  
54  
55  
56  
57  
58  
59  
60

1  
2  
3  
4 The results of this validation study emphasize the need for caution when relying on ICD-10 codes for  
5 hyponatremia in research. Based on the estimated PPV and specificity, patients with an ICD-10 code  
6 of hyponatremia can safely be assumed to actually have hyponatremia. However, the low sensitivity  
7 renders the ICD-10 codes inappropriate for use in studies examining prevalence, incidence, and  
8 absolute risk, due to a high degree of misclassification. Sensitivity increased with decreasing serum  
9 sodium levels, suggesting that studies using ICD-codes to identify hyponatremia would be based  
10 mainly on severe cases. Furthermore, our results indicate that quality of registration differs according  
11 to age, gender, and morbidity status. Hence, studies may be susceptible to differential  
12 misclassification, again resulting in biased results.  
13  
14  
15  
16  
17  
18  
19  
20  
21  
22  
23  
24  
25

## 26 **CONCLUSION**

27  
28 We found that the ICD-10 coding of hyponatremia in DNRP has high specificity but is highly  
29 incomplete, resulting in very low sensitivity. When available, laboratory test results for serum sodium  
30 will more correctly identify patients with hyponatremia.  
31  
32  
33  
34  
35  
36  
37  
38  
39  
40  
41  
42  
43  
44  
45  
46  
47  
48  
49  
50  
51  
52  
53  
54  
55  
56  
57  
58  
59  
60

1  
2  
3  
4  
5  
6  
7  
8  
9  
10  
11  
12  
13  
14  
15  
16  
17  
18  
19  
20  
21  
22  
23  
24  
25  
26  
27  
28  
29  
30  
31  
32  
33  
34  
35  
36  
37  
38  
39  
40  
41  
42  
43  
44  
45  
46  
47  
48  
49  
50  
51  
52  
53  
54  
55  
56  
57  
58  
59  
60

## Contributors

LHB participated in the design of the study, performed the data analysis, provided interpretation of study results and drafted the manuscript. SPU participated in acquisition and analysis of data. CFC and HTS participated in the design of the study, provided interpretation of study results and helped draft the manuscript. TR and JOLJ contributed with interpretation of study results helped draft the manuscript. All authors read and approved the final manuscript.

## Funding

This work was supported by the Clinical Epidemiology Research Foundation and by the Danish Cancer Society (grant no. R73-A4284-13-S17).

## Competing interests

JOLJ has received an unrestricted research grant and lecture fees from Otsuka Pharma Scandinavia AB. TR has received lecture fees from Otsuka Pharma Scandinavia AB.

LHB, CFC, SPU and HTS are salaried employees of Department of Clinical Epidemiology, Aarhus University Hospital. The Department of Clinical Epidemiology receives funding from companies in the form of research grants to (and administered by) Aarhus University.

None of these grants or fees had any had any leverage on the design, implementation or reporting of the present study.

**Data Sharing Statement:** No additional data

## Reference list

- 1 Upadhyay A, Jaber BL, Madias NE. Incidence and prevalence of hyponatremia. *Am J Med* 2006;**119**(Suppl 1):S30-5.
- 2 Rose BD. Clinical physiology of acid-base and electrolyte disorders. 3rd ed. New York: McGraw-Hill information Services Company 1989.
- 3 Waikar SS, Curhan GC, Brunelli SM. Mortality associated with low serum sodium concentration in maintenance hemodialysis. *Am J Med* 2011;**124**:77-84.
- 4 Doshi SM, Shah P, Lei X, *et al.* Hyponatremia in hospitalized cancer patients and its impact on clinical outcomes. *Am J Kidney Dis* 2012;**59**:222-228.
- 5 Goldberg A, Hammerman H, Petcherski S, *et al.* Prognostic importance of hyponatremia in acute ST-elevation myocardial infarction. *Am J Med* 2004;**117**:242-248.
- 6 Kovesdy CP, Lott EH, Lu JL, *et al.* Hyponatremia, Hypernatremia and Mortality in Patients with Chronic Kidney Disease with and without Congestive Heart Failure. *Circulation* 2012;**125**:677-684
- 7 Scherz N, Labarere J, Mean M, *et al.* Prognostic importance of hyponatremia in patients with acute pulmonary embolism. *Am J Respir Crit Care Med* 2010;**182**:1178-1183.
- 8 Wald R, Jaber BL, Price LL, *et al.* Impact of hospital-associated hyponatremia on selected outcomes. *Arch Intern Med* 2010;**170**:294-302.
- 9 Chawla A, Sterns RH, Nigwekar SU, *et al.* Mortality and serum sodium: do patients die from or with hyponatremia? *Clin J Am Soc Nephrol* 2011;**6**:960-965.

1  
2  
3  
4 10 Marco J, Barba R, Matia P, *et al.* Low prevalence of hyponatremia codification in departments of  
5 internal medicine and its prognostic implications. *Curr Med Res Opin* 2013;**29**:1757-1762  
6  
7

8  
9  
10 11 Sorensen HT, Sabroe S, Olsen J. A framework for evaluation of secondary data sources for  
11 epidemiological research. *Int J Epidemiol* 1996;**25**:435-442.  
12  
13

14  
15 12 Gandhi S, Shariff SZ, Fleet JL, *et al.* Validity of the International Classification of Diseases 10th  
16 revision code for hospitalisation with hyponatraemia in elderly patients. *BMJ Open*  
17 2012;**2**:10.1136/bmjopen-2012-001727. Print 2012.  
18  
19  
20  
21

22  
23 13 Movig KL, Leufkens HG, Lenderink AW, *et al.* Validity of hospital discharge International  
24 Classification of Diseases (ICD) codes for identifying patients with hyponatremia. *J Clin Epidemiol*  
25 2003;**56**:530-535.  
26  
27  
28

29  
30 14 Shea AM, Curtis LH, Szczech LA, *et al.* Sensitivity of International Classification of Diseases codes  
31 for hyponatremia among commercially insured outpatients in the United States. *BMC Nephrol*  
32 2008;**9**:5.  
33  
34  
35  
36

37  
38 15 Andersen TF, Madsen M, Jorgensen J, *et al.* The Danish National Hospital Register. A valuable  
39 source of data for modern health sciences. *Dan Med Bull* 1999;**46**:263-268.  
40  
41  
42

43  
44 16 Lynge E, Sandegaard JL, Rebolj M. The Danish National Patient Register. *Scand J Public Health*  
45 2011;**39**(Suppl 7):30-33.  
46  
47

48  
49 17 Pedersen CB. The Danish Civil Registration System. *Scand J Public Health* 2011;**39**(Suppl 7):22-  
50 25.  
51  
52  
53  
54  
55  
56  
57  
58  
59  
60

1  
2  
3  
4 18 Grann AF, Erichsen R, Nielsen AG, *et al*. Existing data sources for clinical epidemiology: The  
5 clinical laboratory information system (LABKA) research database at Aarhus University, Denmark. *Clin*  
6  
7  
8  
9 *Epidemiol* 2011;**3**:133-138.

10  
11 19 SSI - Joint Content for Basic Registration of Hospital Patients.

12  
13 <http://www.ssi.dk/Sundhedsdataogit/Indberetning%20og%20patientregistrering/Patientregistrering/Faellesindhold.aspx> (accessed 18 Dec 2013; updated 9 Dec 2013).

14  
15  
16  
17  
18  
19 20 Laboratory Manual for Hospitals in the North Jutland Region. 2011.

20  
21 <http://www.laboratorievejledning.dk/prog/view.aspx?AfsnitID=103&KapitelID=26&UKapitelID=194>  
22  
23 (accessed 15 Dec 2013; updated 20 Dec 2011).

24  
25  
26  
27 21 Charlson ME, Pompei P, Ales KL, *et al*. A new method of classifying prognostic comorbidity in  
28 longitudinal studies: development and validation. *J Chronic Dis* 1987;**40**:373-383.

29  
30  
31  
32 22 Thygesen SK, Christiansen CF, Christensen S, *et al*. The predictive value of ICD-10 diagnostic  
33 coding used to assess Charlson comorbidity index conditions in the population-based Danish National  
34 Registry of Patients. *BMC Med Res Methodol* 2011;**11**:83.

35  
36  
37  
38 23 Greenland S, Finkle WD. A critical look at methods for handling missing covariates in epidemiologic  
39 regression analyses. *Am J Epidemiol* 1995;**142**:1255-1264.

40  
41  
42  
43 24 Hawkins RC. Age and gender as risk factors for hyponatremia and hypernatremia. *Clin Chim Acta*  
44  
45  
46  
47  
48 2003;**337**:169-172.

49  
50  
51  
52 25 Miller M, Morley JE, Rubenstein LZ. Hyponatremia in a nursing home population. *J Am Geriatr Soc*  
53  
54  
55  
56  
57  
58  
59  
60 1995;**43**:1410-1413.



1  
2  
3  
4  
5  
6  
7  
8  
9  
10 **Validity of the International Classification of Diseases, 10<sup>th</sup> revision (ICD-**  
11 **10) discharge diagnosis codes for hyponatremia in the Danish National**  
12 **Registry of Patients**  
13

14  
15  
16  
17 **Authors and affiliations:**

18 Louise Holland-Bill\* MD

19  
20 Christian Fynbo Christiansen\* MD, PhD

21  
22 Sinna Pilgaard Ulrichsen\* MSc

23  
24 Troels Ring# MD

25  
26 Jens Otto Lunde Jørgensen§ MD, DMSc

27  
28 Henrik Toft Sørensen\* MD, PhD, DMSc.

29  
30 \*Department of Clinical Epidemiology, Aarhus University Hospital, Aarhus, Denmark

31 #Department of Nephrology, Aalborg University Hospital, Aalborg, Denmark

32 §Department of Endocrinology and Internal Medicine, Aarhus University Hospital, Aarhus, Denmark  
33  
34  
35

36 **Corresponding author:**

37 Louise Holland-Bill, MD

38 Department of Clinical Epidemiology, Aarhus University Hospital

39 Olof Palmes Allé 43-45

40 8200 Aarhus N, Denmark

41 E-mail: [louise.bill@dce.au.dk](mailto:louise.bill@dce.au.dk)

42 Tel: +45 871 68063

43 Fax: +45 871 67215  
44  
45  
46

47 **Keywords:** validation study; ICD 10; hyponatremia; diagnosis; population register; clinical laboratory

48  
49 information system  
50

51 **Word count:** 2,8293,005  
52  
53  
54  
55  
56  
57  
58  
59  
60

## ABSTRACT

**OBJECTIVE:** To examine the validity of the *International Classification of Diseases*, 10<sup>th</sup> revision (ICD-10) codes for hyponatremia in the nationwide population-based Danish National Registry of Patients (DNRP) among inpatients of all ages.

**DESIGN:** Population-based validation study.

**SETTING:** All somatic hospitals in the North and Central Denmark Regions from 2006 through 2011.

**PARTICIPANTS:** Patients of all ages admitted to hospital (n=819,701 individual patients) during the study period. Patient could be included in the study more than once, and we did not restrict to patients with serum sodium measurements (total of n=2,186,642 hospitalizations).

**MAIN OUTCOME MEASURE:** We validated ICD-10 discharge diagnoses of hyponatremia recorded in the DNRP, using serum sodium measurements obtained from the laboratory information systems (LABKA) research database as the gold standard. One sodium value <135 mmol/l measured at any time during hospitalization confirmed the diagnosis. We estimated sensitivity, specificity, positive predictive value (PPV), and negative predictive value (NPV) for ICD-10 codes for hyponatremia overall and for cut-off points for increasing hyponatremia severity.

**RESULT:** An ICD-10 code for hyponatremia was recorded in the DNRP in 5,850 of the 2,186,642 hospitalizations identified. According to laboratory measurements, however, hyponatremia was present in 306,418 (14%) hospitalizations. Sensitivity of hyponatremia diagnoses was 1.8% (95% confidence interval (CI): 1.7%-1.8%). For sodium values <115mmol/l, sensitivity was 34.3% (95% CI: 32.6%-35.9%). Overall PPV was 92.5% (95% CI: 91.8%-93.1%), and decreased with increasing hyponatremia severity. Specificity and NPV were high for all cut-off points ( $\geq 99.8\%$  and  $\geq 86.2\%$  respectively). Hyponatremic patients without a corresponding ICD-10 discharge diagnosis were younger and had higher Charlson Comorbidity Index scores than hyponatremic patients with a hyponatremia code in the DNRP.

1  
2  
3  
4  
5  
6  
7  
8  
9  
10  
11  
12  
13  
14  
15  
16  
17  
18  
19  
20  
21  
22  
23  
24  
25  
26  
27  
28  
29  
30  
31  
32  
33  
34  
35  
36  
37  
38  
39  
40  
41  
42  
43  
44  
45  
46  
47  
48  
49  
50  
51  
52  
53  
54  
55  
56  
57  
58  
59  
60

**CONCLUSION:** ICD-10 codes for hyponatremia in the DNRP have high specificity, but very low sensitivity. Laboratory test results, not discharge diagnoses, should be used to ascertain hyponatremia.

For peer review only

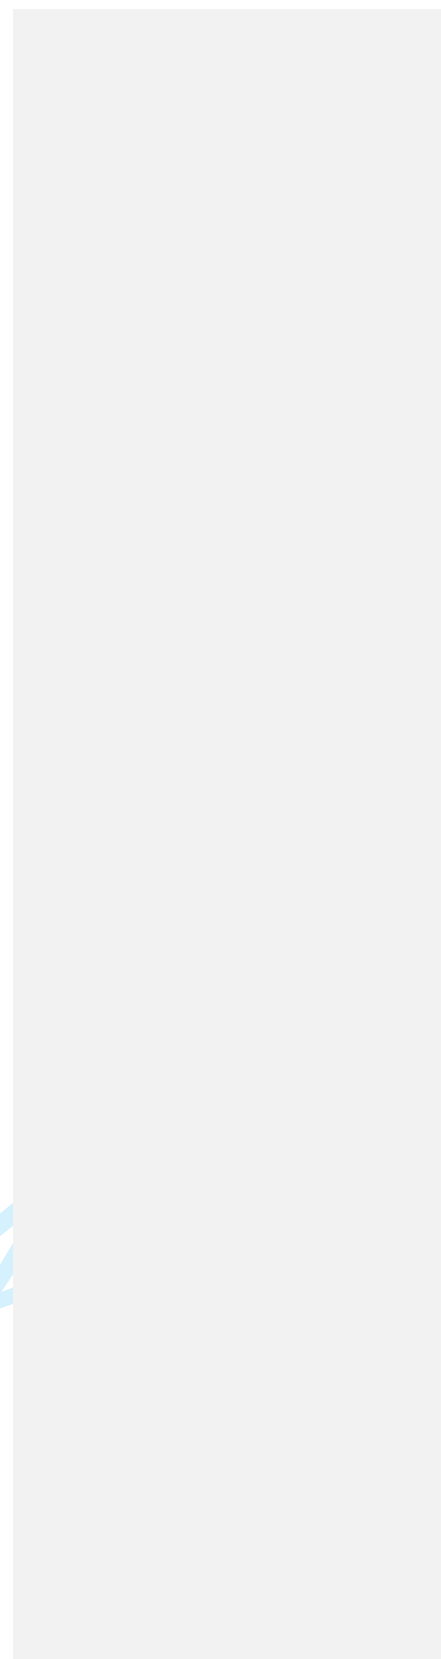

## Article summary

### Article focus

- Hospital discharge diagnoses for hyponatremia recorded in the Danish National Registry of Patients (DNRP) may constitute valuable data sources for epidemiologic studies, however the validity of data must be established.

### Key Message

- ICD-10 coding of hyponatremia in the Danish National Registry of Patients (DNRP) is highly specific but greatly incomplete.
- Epidemiological studies relying on discharge diagnoses of hyponatremia may be susceptible to differential misclassification.

### Strengths and limitation of this study

- This is the first study to validate the International Classification of Diseases, 10th Revision code for hyponatremia in hospitalized patients of all ages.
- We used a population-based design with unambiguous individual-level linkage between registries containing complete data on all hospitalizations and laboratory, ensuring a large sample size and virtually eliminating the risk of selection bias.
- We did not consider the duration of hyponatremia. Sensitivity may have been higher if presence of hyponatremia required, that it was detected in more than one laboratory measurement during hospitalization.

## INTRODUCTION

Hyponatremia, defined as a serum sodium value  $<135\text{mmol/l}$ , is the most common electrolyte abnormality encountered in clinical practice.[1] It can be caused by a large variety of conditions, such as heart failure, kidney failure, cirrhosis, syndrome of inappropriate antidiuretic hormone, vomiting, and diarrhea, and can also be a side effect of several medications.[2] Results of recent studies have indicated that even a mild to moderate level of hyponatremia may be an important predictor of poor prognosis in patients with cardiovascular disease, kidney and liver disease, and cancer.[3-8] However, key aspects of the etiology and prognosis of hyponatremia remain unknown.

The Danish population-based medical registries may offer a unique opportunity for studies of the epidemiology of hyponatremia, if data are valid. However, as symptoms of mild and moderate hyponatremia may be vague, and concealed by or construed as symptoms of an underlying disease, it is likely that the condition will not be reported.[9,10] Thus, use of only inpatient discharge diagnoses of hyponatremia in epidemiologic studies may cause bias that can affect the validity of study results.[11]

To date, only one study has investigated the validity of *International Classification of Diseases* (ICD), 10<sup>th</sup> revision (ICD-10) codes for hyponatremia. This Canadian study was restricted to patients 66 years of age or older ~~presenting with a hyponatremic~~ serum sodium values at the time of emergency department contact or at hospital admission.[12] The sensitivity of hyponatremia coding was found to be as low as 7%. For inpatients younger than 66 years, knowledge of the validity hyponatremia diagnoses is limited to a study performed in a single hospital in the Netherlands using ICD-9 codes for hyponatremia. In this study, sensitivity was found to be just below 2%, using hospital laboratory data as the reference standard.[3] Similar results were found in a study examining the validity of outpatient professional ICD-9 claims for hyponatremia in the US.[14]

1  
2  
3  
4  
5  
6  
7  
8  
9  
10 We therefore conducted the first population-based study examining the validity of ICD-10 inpatient  
11 discharge diagnoses of hyponatremia in the Danish National Registry of Patients (DNRP), ~~in terms of~~  
12 ~~sensitivity, specificity, positive predictive value (PPV), and negative predictive value (NPV)~~, including  
13 patients of all ages.  
14  
15  
16

## 17 18 **METHODS**

### 19 **Setting and data collection**

20 We used the DNRP to identify all admissions to hospitals in the North and Central Denmark Regions  
21 (2.1 million inhabitants in the study period) from 1 January 2006 to 31 December 2011. The DNRP  
22 contains information, including date of admission and discharge, department code and discharge  
23 diagnoses, on all admissions to Danish non-psychiatric hospitals since 1977.[15,16]  
24  
25 By use of the unique 10-digit civil registration number, assigned to all Danish residents since 1968,[17]  
26 we linked each patient's DNRP data to the clinical laboratory information system (LABKA) research  
27 database. For patients living in the North and Central Denmark Regions, data on virtually all  
28 specimens analyzed in clinical laboratories by hospitals and medical practitioners are entered into a  
29 computer-based clinical laboratory information system, which functions as a routine diagnostic tool for  
30 medical personnel.[18] Data are transferred electronically to the LABKA research database, managed  
31 by Aarhus University. Analyses are coded according to the NPU (Nomenclature, Properties and Units)  
32 system. The LABKA research database contains the civil registration number, time and date of blood  
33 sampling, and identification code of the requesting physician or hospital department.[18] We used the  
34 LABKA research database to retrieve information on all serum sodium measurements recorded during  
35 each of the identified hospitalizations.  
36  
37  
38  
39  
40  
41  
42  
43  
44  
45  
46  
47  
48

### 49 **Hyponatremia diagnosis (ICD-10 code algorithm)**

1  
2  
3  
4  
5  
6  
7  
8  
9  
10 At hospital discharge, the attending physician assigns one primary diagnosis, reflecting the main  
11 reason for hospitalization and treatment and up to 19 secondary diagnoses regarding additional  
12 clinically relevant conditions, including underlying diseases, complications and symptoms.[19]  
13 Diagnoses recorded in the DNRP have been coded according to the *International Classification of*  
14 *Diseases* (ICD), 10<sup>th</sup> revision (ICD-10) since 1994.[16]  
15  
16  
17  
18 We developed an algorithm based on ICD-10 codes to identify **primary and secondary** discharge  
19 diagnoses of hyponatremia recorded in the DNRP for each hospitalization. The following ICD-10  
20 codes were included in the algorithm: E87.1 (Hypo-osmolality and hyponatremia), E87.1A  
21 (Hyponatremia) and P74.2B (Hyponatremia in newborns [Danish version of ICD-10]).  
22  
23  
24  
25  
26

### 27 **Gold Standard (laboratory serum sodium measurements)**

28 We used serum sodium measurements recorded in the LABKA research database as the gold  
29 standard to confirm or disconfirm a diagnosis of hyponatremia identified by the ICD-10 algorithm.  
30  
31 Hyponatremia was defined as serum sodium values <135 mmol/l for patients older than 30 days and  
32 <133 mmol/l for infants 30 days of age or younger.[20] Patients were considered to have  
33 hyponatremia if at least one hyponatremic serum sodium value was recorded during their  
34 hospitalization. If no serum sodium measurement was available, the patient was assumed to have a  
35 non-hyponatremic serum sodium value (135-145mmol/l). The following cut-off points for increasing  
36 severity of hyponatremia were chosen: 135 mmol/l, 130mmol/l, 125mmol/l, 120mmol/l and  
37 115mmol/l.[13] The corresponding levels for infants less than 31 days of age were 133mmol/l,  
38 128mmol/l, 123mmol/l, 118mmol/l and 113mmol/l.  
39  
40  
41  
42  
43  
44  
45  
46

### 47 **Other Variables**

48 For each patient, we assessed comorbidity by information retrieved from the DNRP on the conditions  
49 included in the Charlson Comorbidity Index (CCI). The CCI includes 19 medical conditions, each  
50  
51  
52  
53  
54  
55  
56  
57  
58  
59  
60

1  
2  
3  
4  
5  
6  
7  
8  
9  
10 assigned a weighted score between one and six. The sum of these individual scores is used as a  
11 measure of a patient's comorbidity burden.[21, 22] We calculated CCI scores for each patient and  
12 defined three comorbidity levels: low (CCI score 0), medium (CCI score 1-2) and high (CCI score of 3  
13 or above). We included morbidities recorded within 10 years prior to the current hospitalization, as  
14 conditions requiring hospital treatment within this timeframe would likely influence the attending  
15 physician's diagnostic approach and evaluation during the current hospitalization.  
16  
17 Furthermore, we obtained information on department of admission and year of admission from the  
18 DNRP. Departments were categorized in the following five groups: internal medicine, surgery,  
19 gynecology/obstetrics, pediatrics, and other.  
20  
21  
22  
23  
24  
25  
26

### 27 **Statistical analysis**

28 Patients with a hyponatremic serum sodium value recorded in the LABKA research database were  
29 divided into two categories: Those with an ICD-10 code for hyponatremia in the DNRP and those  
30 without. We described both groups of patients in terms of gender, age (median and associated  
31 interquartile range (IQR)), department of admission, CCI score and specific comorbidities.  
32  
33 We estimated the sensitivity, specificity, PPV, and NPV (see Figure 1) for ICD-10 codes for  
34 hyponatremia in the DNRP with corresponding 95% confidence intervals (CI), using the exact method  
35 for binomial proportions. We defined sensitivity as the probability an ICD-10 code for hyponatremia  
36 being registered in the DNRP, when the laboratory test result identified presence of hyponatremia.  
37  
38 Specificity was defined as the probability of an ICD-10 code for hyponatremia not being registered in  
39 the DNRP, when hyponatremia was not identified in laboratory test results. We estimated the PPV as  
40 the proportion of patients for whom an ICD-10 code for hyponatremia recorded in the DNRP could be  
41 confirmed by a serum sodium measurement, and NPV as the proportion of patients with no ICD-10  
42 code for hyponatremia in the DNRP, for whom non-hyponatremic, or no serum sodium values were  
43  
44  
45  
46  
47  
48  
49  
50  
51  
52  
53  
54  
55  
56  
57  
58  
59  
60



1  
2  
3  
4  
5  
6  
7  
8  
9  
10 recorded in the LABKA research database. The analyses were repeated for all hyponatremia cut-off  
11 points and after stratification by [age group categories](#), department of admission and admission year.  
12 Finally, we conducted [three-four](#) sensitivity analyses. First, we performed a complete case analysis, a  
13 method for dealing with missing data considering only subjects with recorded values for all  
14 covariates,[23] meaning that only patients with at least one serum sodium measurement during their  
15 hospitalization were included in the analysis. We did so, in order to evaluate the assumption that  
16 patients without a serum sodium measurement were normonatremic. In the second sensitivity  
17 analysis, we included only patients with more than one serum sodium measurement during their  
18 hospitalization. In the third sensitivity analysis, we included only the ICD-10 codes E87.1A  
19 (hyponatremia) and P74.2B (hyponatremia in newborns). [Because epidemiologic studies often focus](#)  
20 [on incident cases, we performed a post-hoc sensitivity analysis in which we restricted to the first](#)  
21 [hospitalization for each patient in the study period](#)  
22  
23  
24  
25  
26  
27  
28  
29  
30  
31

32 Data analyses were performed using the statistical software package STATA (version 12; Stata Corp,  
33 College Station, TX, USA).

34 The study was approved by the Danish Data Protection Agency (record number 2006-53-1396). [All](#)  
35 [data were obtained from Danish public registries. According to Danish law their use does require](#)  
36 [informed consent or ethics committee approval.](#)  
37  
38  
39  
40  
41

## 42 RESULTS

### 43 Characteristics

44 We identified 2,186,642 hospitalizations (819,701 individual patients) within the study period. For  
45 1,308,740 (60%) hospitalizations, at least one serum sodium measurement was recorded in the  
46 LABKA research database, and for 1,037,647 (47%) subsequent measurements were recorded.  
47  
48  
49  
50  
51  
52  
53  
54  
55  
56  
57  
58  
59  
60

(14%). In the DNRP, we identified 5,850 hospitalizations with an ICD-10 code of hyponatremia (hypo-osmolality and hyponatremia= 3,722, hyponatremia=2,124, hyponatremia in newborns=4) among all 2,186,642 hospitalizations. Of these, 440 did not have a hyponatremic serum sodium value recorded in the LABKA research database.

Table 1 shows the distribution of hospitalizations by presence/absence of an ICD-10 diagnosis of hyponatremia recorded in the DNRP, by gender, age and comorbidity variables, for patients with hyponatremic serum sodium values. Patients who had an ICD-10 code of hyponatremia recorded in the DNRP and a corresponding hyponatremic serum sodium measurement, were on average older, more often female, more likely admitted to an internal medicine department, and characterized by lower comorbidity levels than patients with no hyponatremia diagnosis in the DNRP, but hyponatremic serum sodium values recorded in the LABKA research database. Cerebrovascular disease, dementia, and ulcer disease were the only comorbidities more frequently found in patients with an ICD-10 code for hyponatremia and corresponding hyponatremic serum sodium value, compared to hyponatremic patients without a hyponatremia diagnosis in the DNRP. (Table 1)

**Table 1.**

Characteristics of hospitalizations identified in the DNRP from 2006 to 2011

|                                | Hospitalizations with at least on serum sodium value <135 mmol/l recorded in the LABKA research database |                                                                  | All hospitalizations (n=2,186,642)<br>n (%) |
|--------------------------------|----------------------------------------------------------------------------------------------------------|------------------------------------------------------------------|---------------------------------------------|
|                                | ICD-10 code of hyponatremia in the DNRP* (n=5,410)<br>n (%)                                              | No ICD-10 code of hyponatremia in the DNRP* (n=301,008)<br>n (%) |                                             |
| <b>Sex</b>                     |                                                                                                          |                                                                  |                                             |
| Female                         | 3,643 (67.3)                                                                                             | 148,120 (49.3)                                                   | 1,168,803 (53.5)                            |
| Male                           | 1,767 (32.7)                                                                                             | 152,588 (50.7)                                                   | 1,017,839 (46.5)                            |
| <b>Age, years</b>              |                                                                                                          |                                                                  |                                             |
| Median (IQR)                   | 77.3 (65.7-84.9)                                                                                         | 67.4 (54.2-78.2)                                                 | 54.7 (29.3-71.1)                            |
| <b>Department of admission</b> |                                                                                                          |                                                                  |                                             |
| Internal medicine              | 5,173 (95.6)                                                                                             | 184,848 (61.6)                                                   | 943,121 (43.1)                              |
| Surgical                       | 184 (3.4)                                                                                                | 88,378 (29.4)                                                    | 630,525 (28.8)                              |

|                                  |              |                |                  |
|----------------------------------|--------------|----------------|------------------|
| Gynaecologic/obstetric           | 10 (0.2)     | 7,104 (2.4)    | 347,365 (15.9)   |
| Pediatric                        | 29 (0.5)     | 15,830 (5.3)   | 165,289 (7.6)    |
| Other                            | 14 (0.3)     | 4,848 (1.6)    | 100,342 (4.6)    |
| <b>CCI level (score)</b>         |              |                |                  |
| Low (0)                          | 2,075 (38.4) | 100,398 (33.4) | 1,232,762 (56.4) |
| Medium (1-2)                     | 2,182 (40.3) | 106,874 (35.5) | 588,783 (26.9)   |
| High (≥3)                        | 1,153 (21.3) | 93,736 (31.1)  | 365,097 (16.7)   |
| <b>Specific comorbidities</b>    |              |                |                  |
| Myocardial infarction            | 312 (5.8)    | 23,269 (7.7)   | 108,373 (5.0)    |
| Congestive heart failure         | 460 (8.5)    | 31,236 (10.4)  | 121,429 (5.6)    |
| Peripheral vascular disease      | 464 (8.6)    | 29,356 (9.8)   | 115,620 (5.3)    |
| Cerebrovascular disease          | 1,017 (18.8) | 39,466 (13.1)  | 182,304 (8.3)    |
| Dementia                         | 107 (3.1)    | 4,247 (1.4)    | 20,711 (1.0)     |
| Chronic pulmonary disease        | 870 (16.1)   | 48,726 (16.2)  | 231,121 (10.6)   |
| Connective tissue disease        | 291 (5.4)    | 13,990 (4.7)   | 73,299 (3.4)     |
| Ulcer disease                    | 450 (8.3)    | 20,645 (6.9)   | 79,050 (3.6)     |
| Mild liver disease               | 189 (3.5)    | 13,413 (4.5)   | 37,698 (1.7)     |
| Moderate to severe liver disease | 66 (1.2)     | 6,279 (2.1)    | 14,999 (0.7)     |
| Diabetes I and II                | 521 (9.6)    | 39,995 (13.3)  | 150,205 (6.9)    |
| Diabetes with complications      | 269 (5.0)    | 25,083 (8.3)   | 85,035 (3.9)     |
| Hemiplegia                       | 35 (0.7)     | 2,462 (0.8)    | 16,060 (0.7)     |
| Moderate to severe renal disease | 143 (2.6)    | 20,123 (6.7)   | 75,441 (3.5)     |
| Malignant tumor                  | 781 (14.4)   | 64,882 (21.6)  | 312,845 (14.3)   |
| Leukemia                         | 22 (0.4)     | 4,636 (1.5)    | 17,190 (0.8)     |
| Lymphoma                         | 51 (0.9)     | 7,096 (2.4)    | 25,348 (1.2)     |
| Metastatic cancer                | 183 (3.4)    | 23,948 (8.0)   | 105,512 (4.8)    |
| AIDS                             | 3 (0.1)      | 475 (0.2)      | 2,014 (0.1)      |

\* DNRP = Danish National Registry of Patients

### Sensitivity, specificity, PPV and NPV

For 440 (7.5%) of the 5,850 hospitalizations with an ICD-10 code for hyponatremia recorded in the DNRP, no hyponatremic serum sodium measurement was recorded in the LABKA research database during the hospitalization (for 178, no measurement was recorded at all). This corresponds to a PPV of an ICD-10 code for hyponatremia of 92.5% (95% CI: 91.8%–93.1%) for serum sodium values <135 mmol/l (<133 mmol/l for infants 30 days of age or younger). As expected, PPV decreased with lower serum sodium cut-off points. A total of 5,410 hospitalizations had both an ICD-10 code recorded in the

DNRP and a corresponding hyponatremic laboratory measurement, resulting in a sensitivity of the ICD-10 codes of 1.8% (95% CI: 1.7%–1.8%). Sensitivity increased with lower cut-off points for serum sodium, reaching 34.3% (95% CI: 32.6%–35.9%) for serum sodium <115 mmol/l. Specificity and NPV for serum sodium <135 mmol/l were 100% (97.5% CI: 100%) and 86.2% (95% CI: 86.2%–86.2%), respectively. Specificity and NPV remained high for all serum sodium cut-off points (Table 2).

**Table 2.**

Validity of ICD-10 codes for hyponatremia recorded in the DNRP\*, using serum sodium measurements in the LABKA research database as gold standard.

| Hyponatremic serum sodium value recorded in LABKA research database (mmol/l) | ICD-10 code for hyponatremia recorded in the DNRP* |       |           | Validity Measures % (95% CI) |             |                  |
|------------------------------------------------------------------------------|----------------------------------------------------|-------|-----------|------------------------------|-------------|------------------|
|                                                                              | Yes                                                | No    | Total     |                              |             |                  |
| <b>Overall</b>                                                               |                                                    |       |           |                              |             |                  |
| Na<135 <sup>a</sup>                                                          | Yes                                                | 5,410 | 301,008   | 306,418                      | Sensitivity | 1.8 (1.7-1.8)    |
|                                                                              | No                                                 | 440   | 1,879,784 | 1,880,224                    | Specificity | 100 (100-100)    |
|                                                                              | Total                                              | 5,850 | 2,180,792 | 2,186,642                    | PPV         | 92.5 (91.8-93.1) |
|                                                                              |                                                    |       |           |                              | NPV         | 86.2 (86.2-86.2) |
| <b>Cut-off points for increasing severity of hyponatremia</b>                |                                                    |       |           |                              |             |                  |
| Na<130 <sup>b</sup>                                                          | Yes                                                | 4,528 | 80,605    | 85,133                       | Sensitivity | 5.3 (5.2-5.5)    |
|                                                                              | No                                                 | 1,322 | 2,100,187 | 2,101,509                    | Specificity | 99.9 (99.9-99.9) |
|                                                                              | Total                                              | 5,850 | 2,180,792 | 2,186,642                    | PPV         | 77.4 (76.3-78.5) |
|                                                                              |                                                    |       |           |                              | NPV         | 96.3 (96.3-96.3) |
| Na<125 <sup>c</sup>                                                          | Yes                                                | 3,261 | 21,544    | 24,805                       | Sensitivity | 13.1 (12.7-13.6) |
|                                                                              | No                                                 | 2,589 | 2,159,248 | 2,161,837                    | Specificity | 99.9 (99.9-99.9) |
|                                                                              | Total                                              | 5,850 | 2,180,792 | 2,186,642                    | PPV         | 55.7 (54.5-57.0) |
|                                                                              |                                                    |       |           |                              | NPV         | 99.0 (99.0-99.0) |
| Na<120 <sup>d</sup>                                                          | Yes                                                | 2,061 | 6,219     | 8,280                        | Sensitivity | 24.9 (24.0-25.9) |
|                                                                              | No                                                 | 3,789 | 2,174,573 | 2,178,362                    | Specificity | 99.8 (99.8-99.8) |
|                                                                              | Total                                              | 5,850 | 2,180,792 | 2,186,642                    | PPV         | 35.2 (34.0-36.5) |
|                                                                              |                                                    |       |           |                              | NPV         | 99.7 (99.7-99.7) |
| Na<115 <sup>e</sup>                                                          | Yes                                                | 1,107 | 2,127     | 3,234                        | Sensitivity | 34.3 (32.6-35.9) |
|                                                                              | No                                                 | 4,743 | 2,178,665 | 2,183,408                    | Specificity | 99.8 (99.8-99.8) |
|                                                                              | Total                                              | 5,850 | 2,180,792 | 2,186,642                    | PPV         | 18.9 (17.9-20.0) |
|                                                                              |                                                    |       |           |                              | NPV         | 99.9 (99.9-99.9) |

\*DNRP = Danish National Registry of Patients

<sup>a</sup> Corresponding to <133 mmol/l for infants of 30 day or less of age

<sup>b</sup> Corresponding to <128 mmol/l for infants of 30 day or less of age

<sup>c</sup> Corresponding to <123 mmol/l for infants of 30 day or less of age

<sup>d</sup> Corresponding to <118 mmol/l for infants of 30 day or less of age

<sup>s</sup> Corresponding to <113 mmol/l for infants of 30 day or less of age

Sensitivity was higher among admissions to internal medicine departments than among admissions to surgical, gynecologic/obstetric, pediatric, and "other" departments (Table 3). The validity measures were virtually unchanged across strata of admission year.

**Table 3.**

Validity of ICD-10 codes for hyponatremia recorded in the DNRP, stratified by age group categories, year and department of admission, for serum sodium values <135mmol/l<sup>s</sup> and <125mmol/l<sup>#</sup>

|                           | Sensitivity<br>% (95% CI) |                     | Specificity<br>% (95% CI) |                     | PPV<br>% (95% CI)   |                     | NPV<br>% (95% CI)   |                     |
|---------------------------|---------------------------|---------------------|---------------------------|---------------------|---------------------|---------------------|---------------------|---------------------|
|                           | 135 mmol/l                | <125 mmol/l         | <135 mmol/l               | <125 mmol/l         | <135 mmol/l         | <125 mmol/l         | <135 mmol/l         | <125 mmol/l         |
| <b>Age, years</b>         |                           |                     |                           |                     |                     |                     |                     |                     |
| < 15                      | 0.2<br>(0.1-0.2)          | 3.0<br>(1.5-5.2)    | 100<br>(100-100)          | 100<br>(100-100)    | 84.4<br>(67.2-94.7) | 34.4<br>(18.6-53.2) | 94.6<br>(94.6-94.7) | 99.9<br>(99.9-99.9) |
| 15-34                     | 0.2<br>(0.2-0.3)          | 4.7<br>(3.0-6.9)    | 100<br>(100-100)          | 100<br>(100-100)    | 80.0<br>(65.4-90.4) | 51.1<br>(35.8-66.3) | 95.5<br>(95.4-95.5) | 99.9<br>(99.9-99.9) |
| 35-49                     | 0.9<br>(0.8-1.0)          | 7.8<br>(6.7-9.0)    | 100<br>(100-100)          | 100<br>(100-100)    | 91.3<br>(87.3-94.4) | 67.2<br>(61.2-72.8) | 90.8<br>(90.7-90.9) | 99.3<br>(99.3-99.3) |
| 50-64                     | 1.3<br>(1.3-1.4)          | 9.6<br>(8.9-10.3)   | 100<br>(100-100)          | 99.9<br>(99.9-99.9) | 93.9<br>(92.2-95.3) | 69.6<br>(66.7-72.3) | 83.6<br>(83.5-83.7) | 98.5<br>(98.4-98.5) |
| 65-79                     | 1.8<br>(1.7-1.9)          | 13.6<br>(12.9-14.4) | 100<br>(100-100)          | 99.8<br>(99.8-99.8) | 92.9<br>(91.7-94.0) | 57.2<br>(55.0-59.3) | 79.1<br>(78.9-79.2) | 98.5<br>(98.4-98.5) |
| ≥80                       | 3.4<br>(3.3-3.6)          | 21.0<br>(19.9-22.1) | 99.9<br>(99.9-99.9)       | 99.5<br>(99.5-99.5) | 92.0<br>(90.8-93.0) | 47.7<br>(45.7-49.7) | 75.7<br>(75.5-75.9) | 98.3<br>(98.3-98.4) |
| <b>Admission Year</b>     |                           |                     |                           |                     |                     |                     |                     |                     |
| 2006                      | 1.5<br>(1.4-1.7)          | 12.5<br>(11.5-13.5) | 100<br>(100-100)          | 99.9<br>(99.9-99.9) | 92.8<br>(90.8-94.5) | 66.6<br>(63.2-69.9) | 86.8<br>(86.6-86.9) | 99.0<br>(98.9-99.0) |
| 2007                      | 1.4<br>(1.3-1.5)          | 12.0<br>(11.0-13.1) | 100<br>(100-100)          | 99.9<br>(99.9-99.9) | 94.4<br>(92.4-96.0) | 65.3<br>(61.6-68.8) | 87.0<br>(86.9-87.1) | 99.0<br>(99.0-99.1) |
| 2008                      | 1.7<br>(1.6-1.8)          | 12.3<br>(11.3-13.3) | 100<br>(100-100)          | 99.9<br>(99.9-99.9) | 91.1<br>(89.1-92.8) | 53.6<br>(50.4-56.8) | 85.9<br>(85.8-86.1) | 99.0<br>(98.9-99.0) |
| 2009                      | 1.8<br>(1.7-1.9)          | 12.6<br>(11.6-13.6) | 100<br>(100-100)          | 99.9<br>(99.8-99.9) | 93.4<br>(91.7-94.8) | 51.4<br>(48.4-54.5) | 85.5<br>(85.3-85.6) | 99.0<br>(98.9-99.0) |
| 2010                      | 1.9<br>(1.8-2.0)          | 14.2<br>(13.2-15.4) | 100<br>(100-100)          | 99.9<br>(99.9-99.9) | 91.6<br>(89.8-93.2) | 54.4<br>(51.4-57.4) | 86.3<br>(86.2-86.4) | 99.1<br>(99.0-99.1) |
| 2011                      | 2.2<br>(2.0-2.3)          | 15.2<br>(14.1-16.4) | 100<br>(100-100)          | 99.9<br>(99.9-99.9) | 92.2<br>(90.6-93.6) | 49.8<br>(47.0-52.7) | 85.8<br>(85.7-85.9) | 99.1<br>(99.0-99.1) |
| <b>Department</b>         |                           |                     |                           |                     |                     |                     |                     |                     |
| Internal medicine         | 2.7<br>(2.7-2.8)          | 16.5<br>(16.0-17.0) | 99.9<br>(99.9-100)        | 99.7<br>(99.7-99.7) | 92.8<br>(92.1-93.4) | 56.0<br>(54.7-57.3) | 80.3<br>(80.2-80.4) | 98.3<br>(98.3-98.3) |
| Surgical                  | 0.2<br>(0.2-0.2)          | 2.3<br>(1.9-2.8)    | 100<br>(100-100)          | 100<br>(100-100)    | 90.6<br>(85.8-94.3) | 57.6<br>(50.5-64.5) | 86.0<br>(85.9-86.1) | 99.2<br>(99.2-99.2) |
| Gynecologic/<br>Obstetric | 0.1<br>(0.1-0.3)          | 3.1<br>(1.2-6.7)    | 100<br>(100-100)          | 100<br>(100-100)    | 76.9<br>(46.2-95.0) | 46.2<br>(19.2-74.9) | 98.0<br>(97.9-98.0) | 99.9<br>(99.9-100)  |
| Pediatric                 | 0.2<br>(0.1-0.3)          | 3.4<br>(1.7-5.8)    | 100<br>(100-100)          | 100<br>(100-100)    | 85.3<br>(68.9-95.0) | 35.3<br>(19.7-53.5) | 90.4<br>(90.3-90.6) | 99.8<br>(99.8-99.8) |
| Other                     | 0.3                       | 1.5                 | 100                       | 100                 | 58.3                | 16.7                | 95.2                | 99.7                |

1  
2  
3  
4  
5  
6  
7  
8  
9  
10  
11  
12  
13  
14  
15  
16  
17  
18  
19  
20  
21  
22  
23  
24  
25  
26  
27  
28  
29  
30  
31  
32  
33  
34  
35  
36  
37  
38  
39  
40  
41  
42  
43  
44  
45  
46  
47  
48  
49  
50  
51  
52  
53  
54  
55  
56  
57  
58  
59  
60

|  |           |           |           |           |             |             |             |             |
|--|-----------|-----------|-----------|-----------|-------------|-------------|-------------|-------------|
|  | (0.2-0.5) | (0.4-3.9) | (100-100) | (100-100) | (36.6-77.9) | (4.74-37.4) | (95.0-95.3) | (99.7-99.8) |
|--|-----------|-----------|-----------|-----------|-------------|-------------|-------------|-------------|

\* DNRP = Danish National Registry of Patients  
 † Corresponding to <133mmol/l for infants of 30 day or less of age  
 ‡ Corresponding to <123mmol/l for infants of 30 day or less of age

**Sensitivity analyses**

Compared to the primary analyses, we observed no changes in neither sensitivity nor specificity estimates when including only patients with at least one serum sodium measurement during their hospitalization in the analysis. PPV increased slightly for all serum sodium cut-off points, while NPV decreased for the three highest cut-off points. Including only patients with more than one serum sodium measurement also yielded almost identical results (Table 24).

After restriction to the most specific ICD-10 codes for hyponatremia, PPV increased slightly and sensitivity decreased (94.6% (95% CI: 93.6%–95.6%) and 0.7% (95% CI: 0.6%–0.7%), respectively).

Estimates of specificity and NPV were virtually unchanged (Table 24).

We observed a slight increase in sensitivity for serum sodium cut-off points <130 mmol/l but not for the overall estimate when restricting to the first hospitalization in the study period. PPV and NPV generally increased, although only very slightly for the overall estimate (Table 4).

**Table 4.**

Sensitivity Analyses.

| Hyponatremic serum sodium value recorded in LABKA research database (mmol/l) | Primary Analysis (including all admissions for all patients in the study period) % (95% CI) | Sensitivity Analyses                                                              |                                                                         |                                                                  |                                                                           |
|------------------------------------------------------------------------------|---------------------------------------------------------------------------------------------|-----------------------------------------------------------------------------------|-------------------------------------------------------------------------|------------------------------------------------------------------|---------------------------------------------------------------------------|
|                                                                              |                                                                                             | Requiring at least one serum sodium measurement during hospitalization % (95% CI) | Requiring >1 serum sodium measurement during hospitalization % (95% CI) | ICD-10 algorithm restricted to code E87.1A and P74.2B % (95% CI) | Restricting to first admission per patient in the study period % (95% CI) |
| <b>Overall</b>                                                               | Sensitivity 1.8 (1.7-1.8)<br>Specificity 100 (100-100)                                      | 1.8 (1.7-1.8)<br>100 (100-100)                                                    | 1.9 (1.8-2.0)<br>100 (100-100)                                          | 0.7 (0.6-0.7)<br>100 (100-100)                                   | 1.7(1.7-1.9)<br>100 (100-100)                                             |
| <b>Na&lt;135</b>                                                             | PPV 92.5 (91.8-93.1)<br>NPV 86.2 (86.2-86.2)                                                | 95.4 (94.8-95.9)<br>76.9 (76.8-77.0)                                              | 95.8 (95.2-96.3)<br>74.7 (74.6-74.8)                                    | 94.6 (93.6-95.6)<br>86.1 (86.0-86.1)                             | 93.5 (92.0-94.7)<br>91.6 (91.6-91.7)                                      |
| <b>Cut-off points for increasing severity of hyponatremia</b>                |                                                                                             |                                                                                   |                                                                         |                                                                  |                                                                           |

|                  |                    |                         |                         |                         |                         |                         |
|------------------|--------------------|-------------------------|-------------------------|-------------------------|-------------------------|-------------------------|
| <u>Na&lt;130</u> | <u>Sensitivity</u> | <u>5.3 (5.2-5.5)</u>    | <u>5.3 (5.2-5.5)</u>    | <u>5.6 (5.4-5.7)</u>    | <u>2.1 (2.0-2.2)</u>    | <u>6.3 (5.9-6.7)</u>    |
|                  | <u>Specificity</u> | <u>99.9 (99.9-99.9)</u> | <u>99.9 (99.9-99.9)</u> | <u>99.9 (99.9-99.9)</u> | <u>100 (100-100)</u>    | <u>100 (100-100)</u>    |
|                  | <u>PPV</u>         | <u>77.4 (76.3-78.5)</u> | <u>79.8 (78.7-80.9)</u> | <u>80.5 (79.4-81.6)</u> | <u>83.0 (81.4-84.6)</u> | <u>82.2 (80.7-84.8)</u> |
|                  | <u>NPV</u>         | <u>96.3 (96.3-96.3)</u> | <u>93.8 (93.8-93.9)</u> | <u>93.0 (93.0-93.1)</u> | <u>96.2 (96.2-96.2)</u> | <u>97.9 (97.9-98.0)</u> |
| <u>Na&lt;125</u> | <u>Sensitivity</u> | <u>13.1 (12.7-13.6)</u> | <u>13.1 (12.7-13.6)</u> | <u>13.6 (13.1-14.0)</u> | <u>5.4 (5.1-5.7)</u>    | <u>15.6 (14.6-16.6)</u> |
|                  | <u>Specificity</u> | <u>99.9 (99.9-99.9)</u> | <u>99.8 (99.8-99.8)</u> | <u>99.8 (99.8-99.8)</u> | <u>100 (100-100)</u>    | <u>99.9 (99.9-99.9)</u> |
|                  | <u>PPV</u>         | <u>55.7 (54.5-57.0)</u> | <u>57.5 (56.2-58.8)</u> | <u>57.9 (56.5-59.2)</u> | <u>62.5 (60.4-64.5)</u> | <u>62.3 (59.6-64.8)</u> |
|                  | <u>NPV</u>         | <u>99.0 (99.0-99.0)</u> | <u>98.3 (98.3-98.4)</u> | <u>98.1 (98.1-98.1)</u> | <u>98.9 (98.9-98.9)</u> | <u>99.4 (99.4-99.4)</u> |
| <u>Na&lt;120</u> | <u>Sensitivity</u> | <u>24.9 (24.0-25.9)</u> | <u>24.9 (24.0-25.8)</u> | <u>25.4 (24.5-26.4)</u> | <u>6.3 (5.8-6.9)</u>    | <u>29.3 (27.3-31.3)</u> |
|                  | <u>Specificity</u> | <u>99.8 (99.8-99.8)</u> | <u>99.7 (99.7-99.7)</u> | <u>99.7 (99.7-99.7)</u> | <u>100 (100-100)</u>    | <u>99.9 (99.9-99.9)</u> |
|                  | <u>PPV</u>         | <u>35.2 (34.0-36.5)</u> | <u>36.3 (35.1-37.6)</u> | <u>36.3 (35.0-37.6)</u> | <u>50.6 (47.5-53.7)</u> | <u>43.7 (41.0-46.4)</u> |
|                  | <u>NPV</u>         | <u>99.7 (99.7-99.7)</u> | <u>99.5 (99.5-99.5)</u> | <u>99.5 (99.4-99.5)</u> | <u>99.6 (99.6-99.7)</u> | <u>99.8 (99.8-99.8)</u> |
| <u>Na&lt;115</u> | <u>Sensitivity</u> | <u>34.3 (32.6-35.9)</u> | <u>34.2 (32.6-35.9)</u> | <u>34.9 (33.1-36.6)</u> | <u>9.3 (8.3-10.3)</u>   | <u>38.8 (35.5-42.1)</u> |
|                  | <u>Specificity</u> | <u>99.8 (99.8-99.8)</u> | <u>99.7 (99.6-99.7)</u> | <u>99.6 (99.6-99.6)</u> | <u>100 (100-100)</u>    | <u>99.9 (99.9-99.9)</u> |
|                  | <u>PPV</u>         | <u>18.9 (17.9-20.0)</u> | <u>19.5 (18.5-20.6)</u> | <u>19.5 (18.4-20.6)</u> | <u>28.8 (26.1-31.7)</u> | <u>24.2 (22.0-26.6)</u> |
|                  | <u>NPV</u>         | <u>99.9 (99.9-99.9)</u> | <u>99.8 (99.8-99.8)</u> | <u>99.8 (99.8-99.8)</u> | <u>99.9 (99.9-99.9)</u> | <u>99.9 (99.9-99.9)</u> |

## DISCUSSION

This is the first study to report on the validity of ICD-10 coding of hyponatremia using comprehensive population-based medical registries, and including patients of all ages. A record of a hyponatremia diagnosis in the DNRP was found to be specific to and highly predictive of hyponatremia confirmed by laboratory values. However, the disorder was greatly underreported, though to a lesser extent in patients admitted to an internal medicine department compared to other departments. We found sensitivity to be low even for severe degrees of hyponatremia. These results were robust when we used a stricter definition of hyponatremia and complete case analysis.

Our findings correspond with those of Movig *et al.*'s single-center study conducted in The Netherlands, in which ICD-9-CM coding of hyponatremia in inpatient discharge records was compared with hospital laboratory data.[13] As in our study, sensitivity at the cut-off point of 135 mmol/l was 1.7%, and increased with decreasing serum sodium levels. Sensitivity thus reached 30.6% for values below 115 mmol/l. In addition, their estimates for PPV, NPV, and specificity were similar to our results (91.7%, 79.5% and <99.9%, respectively). A Canadian study by Gandhi *et al.* examined ICD-10 coding for hyponatremia and reported a sensitivity of ~~4.56.4~~4.4% for the cut-off point of <135 mmol/l and ~~34.441.7~~34.4%.

1  
2  
3  
4  
5  
6  
7  
8  
9  
10 for the cut-off point of 125 mmol/l.[12] The study was, however, restricted to patients  $\geq 66$  years of age  
11 presenting with hyponatremic laboratory test result serum sodium values at time of admission or  
12 emergency department contact. In line with their results, we found that the median age of patients with  
13 an ICD-10 code of hyponatremia recorded in the DNRP, which could be confirmed by laboratory  
14 results, was higher than that of hyponatremic patients with no ICD-10 code for hyponatremia recorded  
15 in the DNRP. However, the sensitivity estimates did not reach those found by Gandhi et al. even for  
16 patients 65-79 and  $\geq 80$  years of age. Shea *et al.* also reported higher sensitivity compared to our  
17 results (3.5% for a cut-off point of  $<136$  mmol/l and 29.6% for the cut-off point of 125 mmol/l) in their  
18 study examining the validity of ICD-9 codes of hyponatremia in an outpatient managed-care  
19 population.[14] Outpatient serum sodium laboratory tests were compared with outpatient professional  
20 ICD-9 claims registered within 15 days before or after the laboratory claim. The PPV was 62.6% for  
21 serum sodium levels  $<136$  mmol/l and 10.4% for levels  $<125$  mmol/l. As noted in the paper, detected  
22 hyponatremia may be the cause for follow-up visits in an outpatient setting, without the need for repeat  
23 measurements. This could lead to lower PPV compared to our study and the study by Movig *et al.* In  
24 addition, managed-care claims databases encompass an employer-based commercially insured  
25 population. Shea *et al.*'s study thus may not be representative of elderly populations, in which  
26 prevalence of hyponatremia is high.[24, 25] This also may explain why their results differed from ours.

27  
28  
29  
30  
31  
32  
33  
34  
35  
36  
37  
38  
39  
40 The major strengths of our study are its population-based design and unambiguous individual-level  
41 linkage between registries containing complete data on all hospitalizations and laboratory tests in a  
42 well-defined population. This eliminates the risk of selection bias. Several potential study limitations  
43 must be considered. We relied on only one (the lowest) serum sodium value recorded to define  
44 presence of hyponatremia, and also did not consider duration of hyponatremia. Clinicians may be  
45 more likely to regard hyponatremia as clinically relevant, and hence to include the condition in  
46 discharge diagnoses, if it is detected in more than one measurement. In this context, it is important to  
47  
48  
49  
50  
51  
52



1  
2  
3  
4  
5  
6  
7  
8  
9  
10 note that patient transfers between departments are registered as separate admissions in the DNRP  
11 and we examined the validity of ICD-10 coding for each registered admission. The PPV may have  
12 been even higher if we had considered contiguous admissions as a single admission. Finally, we  
13 chose to include patients without serum sodium measurements and to consider them as  
14 normonatremic in the main analysis. We did so to detect false positive diagnoses and thereby obtain  
15 accurate estimates of predictive values. Serum sodium is often measured as a routine procedure, and  
16 rarely due to specific suspicion. Though frequently measured, the proportion of patients with  
17 unacknowledged hyponatremia is most often unknown. We therefore performed a complete case  
18 analysis, including only patients with serum sodium measurements. As the results did not differ  
19 markedly from those of the primary analysis, we believe that including patients without serum sodium  
20 measurements in the normonatremic group was justified.  
21  
22  
23  
24  
25  
26  
27  
28  
29

30 We can only speculate on reasons for the low sensitivity of the ICD-10 coding of hyponatremia found  
31 in our study. A diagnosis of hyponatremia was less likely recorded in patients with high levels of  
32 comorbidity, which may indicate that Hhyponatremia is mainly considered a part of the clinical picture  
33 of underlying bystander of the underlying diseases. If hyponatremia is mild or transient, and does not  
34 require intervention or specific attention, it may not warrant documentation. However, even for very  
35 severe hyponatremia (<115 mmol/l), which is potentially fatal and requires immediate intervention,  
36 sensitivity was low. We believe that this most likely reflects negligence of proper coding practice rather  
37 than lack of attention to the clinical importance of low serum sodium levels. With the increasing use of  
38 electronic medical records it would be feasible and worthwhile to automatically assign discharge  
39 diagnoses to patients with gross abnormal laboratory values. However, the ultimate responsibility for  
40 summarizing the most important reasons for treatment and care still rests upon the discharging  
41 physician. Our results suggest that hyponatremia is not coded in the presence of coexisting illness  
42  
43  
44  
45  
46  
47  
48  
49  
50  
51  
52  
53  
54  
55  
56  
57  
58  
59  
60

1  
2  
3  
4  
5  
6  
7  
8  
9  
10 deemed more important, and that the fact that hyponatremia may be an important indicator of a poor  
11 prognosis is not yet acknowledged.  
12

13  
14  
15 The results of this validation study emphasize the need for caution when relying on ICD-10 codes for  
16 hyponatremia in research. Based on the estimated PPV and specificity, patients with an ICD-10 code  
17 of hyponatremia can safely be assumed to actually have hyponatremia. However, the low sensitivity  
18 renders the ICD-10 codes inappropriate for use in studies examining prevalence, incidence, and  
19 absolute risk, due to a high degree of misclassification. Sensitivity increased with decreasing serum  
20 sodium levels, suggesting that studies using ICD-codes to identify hyponatremia would be based  
21 mainly on severe cases. Furthermore, our results indicate that quality of registration differs according  
22 to age, gender, and morbidity status. Hence, studies may be susceptible to differential  
23 misclassification, again resulting in biased results.  
24  
25  
26  
27  
28  
29  
30  
31

### 32 **CONCLUSION**

33  
34 We found that the ICD-10 coding of hyponatremia in DNRP has high specificity but is highly  
35 incomplete, resulting in very low sensitivity. When available, laboratory test results for serum sodium  
36 will more correctly identify patients with hyponatremia.  
37  
38  
39  
40  
41  
42  
43  
44  
45  
46  
47  
48  
49  
50  
51  
52  
53  
54  
55  
56  
57  
58  
59  
60

1  
2  
3  
4  
5  
6  
7  
8  
9  
10  
11  
12  
13  
14  
15  
16  
17  
18  
19  
20  
21  
22  
23  
24  
25  
26  
27  
28  
29  
30  
31  
32  
33  
34  
35  
36  
37  
38  
39  
40  
41  
42  
43  
44  
45  
46  
47  
48  
49  
50  
51  
52  
53  
54  
55  
56  
57  
58  
59  
60

#### Contributors

LHB participated in the design of the study, performed the data analysis, provided interpretation of study results and drafted the manuscript. SPU participated in acquisition and analysis of data. CFC and HTS participated in the design of the study, provided interpretation of study results and helped draft the manuscript. TR and JOLJ contributed with interpretation of study results helped draft the manuscript. All authors read and approved the final manuscript.

#### Funding

This work was supported by the Clinical Epidemiology Research Foundation and by the Danish Cancer Society (grant no. R73-A4284-13-S17).

#### Competing interests

JOLJ has received an unrestricted research grant and lecture fees from Otsuka Pharma Scandinavia AB. TR has received lecture fees from Otsuka Pharma Scandinavia AB.

1  
2  
3  
4  
5  
6  
7  
8  
9  
10 LHB, CFC, SPU and HTS are salaried employees of Department of Clinical Epidemiology, Aarhus  
11 University Hospital. The Department of Clinical Epidemiology receives funding from companies in the  
12 form of research grants to (and administered by) Aarhus University.  
13  
14

15 None of these grants or fees had any had any leverage on the design, implementation or reporting of  
16 the present study.  
17  
18  
19  
20  
21  
22  
23  
24  
25  
26  
27

#### 28 Reference list

29  
30 1 Upadhyay A, Jaber BL, Madias NE. Incidence and prevalence of hyponatremia. *Am J Med*  
31 2006;**119**(Suppl 1):S30-5.  
32  
33

34 2 Rose BD. Clinical physiology of acid-base and electrolyte disorders. 3rd ed. New York: McGraw-Hill  
35 information Services Company 1989.  
36  
37

38 3 Waikar SS, Curhan GC, Brunelli SM. Mortality associated with low serum sodium concentration in  
39 maintenance hemodialysis. *Am J Med* 2011;**124**:77-84.  
40  
41

42 4 Doshi SM, Shah P, Lei X, *et al*. Hyponatremia in hospitalized cancer patients and its impact on  
43 clinical outcomes. *Am J Kidney Dis* 2012;**59**:222-228.  
44  
45

46 5 Goldberg A, Hammerman H, Petcherski S, *et al*. Prognostic importance of hyponatremia in acute  
47 ST-elevation myocardial infarction. *Am J Med* 2004;**117**:242-248.  
48  
49  
50  
51  
52  
53  
54  
55  
56  
57  
58  
59  
60

- 1  
2  
3  
4  
5  
6  
7  
8  
9  
10 6 Kovesdy CP, Lott EH, Lu JL, *et al.* Hyponatremia, Hypernatremia and Mortality in Patients with  
11 Chronic Kidney Disease with and without Congestive Heart Failure. *Circulation* 2012;**125**:677-684  
12  
13  
14 7 Scherz N, Labarere J, Mean M, *et al.* Prognostic importance of hyponatremia in patients with acute  
15 pulmonary embolism. *Am J Respir Crit Care Med* 2010;**182**:1178-1183.  
16  
17  
18 8 Wald R, Jaber BL, Price LL, *et al.* Impact of hospital-associated hyponatremia on selected  
19 outcomes. *Arch Intern Med* 2010;**170**:294-302.  
20  
21  
22  
23 9 Chawla A, Sterns RH, Nigwekar SU, *et al.* Mortality and serum sodium: do patients die from or with  
24 hyponatremia? *Clin J Am Soc Nephrol* 2011;**6**:960-965.  
25  
26  
27 10 Marco J, Barba R, Matia P, *et al.* Low prevalence of hyponatremia codification in departments of  
28 internal medicine and its prognostic implications. *Curr Med Res Opin* 2013;**29**:1757-1762  
29  
30  
31  
32 11 Sorensen HT, Sabroe S, Olsen J. A framework for evaluation of secondary data sources for  
33 epidemiological research. *Int J Epidemiol* 1996;**25**:435-442.  
34  
35  
36 12 Gandhi S, Shariff SZ, Fleet JL, *et al.* Validity of the International Classification of Diseases 10th  
37 revision code for hospitalisation with hyponatraemia in elderly patients. *BMJ Open*  
38 2012;**2**:10.1136/bmjopen-2012-001727. Print 2012.  
39  
40  
41  
42 13 Movig KL, Leufkens HG, Lenderink AW, *et al.* Validity of hospital discharge International  
43 Classification of Diseases (ICD) codes for identifying patients with hyponatremia. *J Clin Epidemiol*  
44 2003;**56**:530-535.  
45  
46  
47  
48  
49  
50  
51  
52  
53  
54

Formatted: English (U.S.)

1  
2  
3  
4  
5  
6  
7  
8  
9  
10 14 Shea AM, Curtis LH, Szczech LA, *et al.* Sensitivity of International Classification of Diseases codes  
11 for hyponatremia among commercially insured outpatients in the United States. *BMC Nephrol*  
12 2008;**9**:5.  
13

14  
15 15 Andersen TF, Madsen M, Jorgensen J, *et al.* The Danish National Hospital Register. A valuable  
16 source of data for modern health sciences. *Dan Med Bull* 1999;**46**:263-268.  
17

18  
19  
20 16 Lynge E, Sandegaard JL, Rebolj M. The Danish National Patient Register. *Scand J Public Health*  
21 2011;**39**(Suppl 7):30-33.  
22

23  
24  
25 17 Pedersen CB. The Danish Civil Registration System. *Scand J Public Health* 2011;**39**(Suppl 7):22-  
26 25.  
27

28  
29 18 Grann AF, Erichsen R, Nielsen AG, *et al.* Existing data sources for clinical epidemiology: The  
30 clinical laboratory information system (LABKA) research database at Aarhus University, Denmark. *Clin*  
31 *Epidemiol* 2011;**3**:133-138.  
32

33  
34  
35 19 SSI - Joint Content for Basic Registration of Hospital Patients.  
36 [http://www.ssi.dk/Sundhedsdataogit/Indberetning%20og%20patientregistrering/Patientregistrering/Fae](http://www.ssi.dk/Sundhedsdataogit/Indberetning%20og%20patientregistrering/Patientregistrering/Faellesindhold.aspx)  
37 [llesindhold.aspx](http://www.ssi.dk/Sundhedsdataogit/Indberetning%20og%20patientregistrering/Patientregistrering/Faellesindhold.aspx) (accessed 18 Dec 2013; updated 9 Dec 2013).  
38

39  
40  
41 20 Laboratory Manual for Hospitals in the North Jutland Region. 2011.  
42 <http://www.laboratorievejledning.dk/prog/view.aspx?AfsnitID=103&KapitelID=26&UKapitelID=194>  
43 (accessed 15 Dec 2013; updated 20 Dec 2011).  
44

45  
46  
47 21 Charlson ME, Pompei P, Ales KL, *et al.* A new method of classifying prognostic comorbidity in  
48 longitudinal studies: development and validation. *J Chronic Dis* 1987;**40**:373-383.  
49

1  
2  
3  
4  
5  
6  
7  
8  
9  
10 22 Thygesen SK, Christiansen CF, Christensen S, *et al*. The predictive value of ICD-10 diagnostic  
11 coding used to assess Charlson comorbidity index conditions in the population-based Danish National  
12 Registry of Patients. *BMC Med Res Methodol* 2011;**11**:83.  
13  
14

15  
16 23 Greenland S, Finkle WD. A critical look at methods for handling missing covariates in epidemiologic  
17 regression analyses. *Am J Epidemiol* 1995;**142**:1255-1264.  
18  
19

20 24 Hawkins RC. Age and gender as risk factors for hyponatremia and hypernatremia. *Clin Chim Acta*  
21 2003;**337**:169-172.  
22  
23

24 25 Miller M, Morley JE, Rubenstein LZ. Hyponatremia in a nursing home population. *J Am Geriatr Soc*  
25 1995;**43**:1410-1413.  
26  
27  
28  
29  
30  
31  
32  
33  
34  
35  
36  
37  
38  
39  
40  
41  
42  
43  
44  
45  
46  
47  
48  
49  
50  
51  
52  
53  
54  
55  
56  
57  
58  
59  
60

|                                                                                              |     | ICD-10 code of hyponatremia<br>recorded in the DNRP* |    |
|----------------------------------------------------------------------------------------------|-----|------------------------------------------------------|----|
|                                                                                              |     | Yes                                                  | No |
| Hyponatremic serum<br>sodium value recorded in<br>LABKA research database<br>(gold standard) | Yes | A                                                    | C  |
|                                                                                              | No  | B                                                    | D  |

Validity measures:  
Sensitivity=  $A/(A+C)$   
Specificity=  $D/(B+D)$   
Positive predictive value=  $A/(A+B)$   
Negative predictive value=  $D/(C+D)$

\*DNRP = Danish National Registry of Patients

Figure 1. Schematic 2x2 table and validity measure estimation formulas  
160x90mm (300 x 300 DPI)

review only



**STROBE 2007 (v4) checklist of items to be included in reports of observational studies in epidemiology\***  
**Checklist for cohort, case-control, and cross-sectional studies (combined)**

| Section/Topic             | Item # | Recommendation                                                                                                                                                                                                                                                                                                                                                                                                                                                         | Reported on page # |
|---------------------------|--------|------------------------------------------------------------------------------------------------------------------------------------------------------------------------------------------------------------------------------------------------------------------------------------------------------------------------------------------------------------------------------------------------------------------------------------------------------------------------|--------------------|
| Title and abstract        | 1      | (a) Indicate the study's design with a commonly used term in the title or the abstract                                                                                                                                                                                                                                                                                                                                                                                 | 1                  |
|                           |        | (b) Provide in the abstract an informative and balanced summary of what was done and what was found                                                                                                                                                                                                                                                                                                                                                                    | 2-3                |
| <b>Introduction</b>       |        |                                                                                                                                                                                                                                                                                                                                                                                                                                                                        |                    |
| Background/rationale      | 2      | Explain the scientific background and rationale for the investigation being reported                                                                                                                                                                                                                                                                                                                                                                                   | 5                  |
| Objectives                | 3      | State specific objectives, including any pre-specified hypotheses                                                                                                                                                                                                                                                                                                                                                                                                      | 6                  |
| <b>Methods</b>            |        |                                                                                                                                                                                                                                                                                                                                                                                                                                                                        |                    |
| Study design              | 4      | Present key elements of study design early in the paper                                                                                                                                                                                                                                                                                                                                                                                                                | 6                  |
| Setting                   | 5      | Describe the setting, locations, and relevant dates, including periods of recruitment, exposure, follow-up, and data collection                                                                                                                                                                                                                                                                                                                                        | 6                  |
| Participants              | 6      | (a) <i>Cohort study</i> —Give the eligibility criteria, and the sources and methods of selection of participants. Describe methods of follow-up<br><i>Case-control study</i> —Give the eligibility criteria, and the sources and methods of case ascertainment and control selection. Give the rationale for the choice of cases and controls<br><i>Cross-sectional study</i> —Give the eligibility criteria, and the sources and methods of selection of participants | 7                  |
|                           |        | (b) <i>Cohort study</i> —For matched studies, give matching criteria and number of exposed and unexposed<br><i>Case-control study</i> —For matched studies, give matching criteria and the number of controls per case                                                                                                                                                                                                                                                 |                    |
| Variables                 | 7      | Clearly define all outcomes, exposures, predictors, potential confounders, and effect modifiers. Give diagnostic criteria, if applicable                                                                                                                                                                                                                                                                                                                               | 6-8                |
| Data sources/ measurement | 8*     | For each variable of interest, give sources of data and details of methods of assessment (measurement). Describe comparability of assessment methods if there is more than one group                                                                                                                                                                                                                                                                                   | 6-8                |
| Bias                      | 9      | Describe any efforts to address potential sources of bias                                                                                                                                                                                                                                                                                                                                                                                                              | 9                  |
| Study size                | 10     | Explain how the study size was arrived at                                                                                                                                                                                                                                                                                                                                                                                                                              | 6-7                |
| Quantitative variables    | 11     | Explain how quantitative variables were handled in the analyses. If applicable, describe which groupings were chosen and why                                                                                                                                                                                                                                                                                                                                           | 7                  |
| Statistical methods       | 12     | (a) Describe all statistical methods, including those used to control for confounding                                                                                                                                                                                                                                                                                                                                                                                  | 8-9                |
|                           |        | (b) Describe any methods used to examine subgroups and interactions                                                                                                                                                                                                                                                                                                                                                                                                    | 8-9                |
|                           |        | (c) Explain how missing data were addressed                                                                                                                                                                                                                                                                                                                                                                                                                            | 7 and 9            |
|                           |        | (d) <i>Cohort study</i> —If applicable, explain how loss to follow-up was addressed<br><i>Case-control study</i> —If applicable, explain how matching of cases and controls was addressed                                                                                                                                                                                                                                                                              |                    |

|                          |     |                                                                                                                                                                                                              |       |
|--------------------------|-----|--------------------------------------------------------------------------------------------------------------------------------------------------------------------------------------------------------------|-------|
|                          |     | <i>Cross-sectional study</i> —If applicable, describe analytical methods taking account of sampling strategy                                                                                                 |       |
|                          |     | (e) Describe any sensitivity analyses                                                                                                                                                                        | 9     |
| <b>Results</b>           |     |                                                                                                                                                                                                              |       |
| Participants             | 13* | (a) Report numbers of individuals at each stage of study—eg numbers potentially eligible, examined for eligibility, confirmed eligible, included in the study, completing follow-up, and analysed            | 9-10  |
|                          |     | (b) Give reasons for non-participation at each stage                                                                                                                                                         | 9-10  |
|                          |     | (c) Consider use of a flow diagram                                                                                                                                                                           |       |
| Descriptive data         | 14* | (a) Give characteristics of study participants (eg demographic, clinical, social) and information on exposures and potential confounders                                                                     | 10-11 |
|                          |     | (b) Indicate number of participants with missing data for each variable of interest                                                                                                                          | 9-10  |
|                          |     | (c) <i>Cohort study</i> —Summarise follow-up time (eg, average and total amount)                                                                                                                             |       |
| Outcome data             | 15* | <i>Cohort study</i> —Report numbers of outcome events or summary measures over time                                                                                                                          |       |
|                          |     | <i>Case-control study</i> —Report numbers in each exposure category, or summary measures of exposure                                                                                                         |       |
|                          |     | <i>Cross-sectional study</i> —Report numbers of outcome events or summary measures                                                                                                                           | 9-10  |
| Main results             | 16  | (a) Give unadjusted estimates and, if applicable, confounder-adjusted estimates and their precision (eg, 95% confidence interval). Make clear which confounders were adjusted for and why they were included | 11-13 |
|                          |     | (b) Report category boundaries when continuous variables were categorized                                                                                                                                    | 11-13 |
|                          |     | (c) If relevant, consider translating estimates of relative risk into absolute risk for a meaningful time period                                                                                             |       |
| Other analyses           | 17  | Report other analyses done—eg analyses of subgroups and interactions, and sensitivity analyses                                                                                                               | 14-15 |
| <b>Discussion</b>        |     |                                                                                                                                                                                                              |       |
| Key results              | 18  | Summarise key results with reference to study objectives                                                                                                                                                     | 15    |
| Limitations              | 19  | Discuss limitations of the study, taking into account sources of potential bias or imprecision. Discuss both direction and magnitude of any potential bias                                                   | 16-17 |
| Interpretation           | 20  | Give a cautious overall interpretation of results considering objectives, limitations, multiplicity of analyses, results from similar studies, and other relevant evidence                                   | 15-18 |
| Generalisability         | 21  | Discuss the generalisability (external validity) of the study results                                                                                                                                        | 16-17 |
| <b>Other information</b> |     |                                                                                                                                                                                                              |       |
| Funding                  | 22  | Give the source of funding and the role of the funders for the present study and, if applicable, for the original study on which the present article is based                                                | 19    |

\*Give information separately for cases and controls in case-control studies and, if applicable, for exposed and unexposed groups in cohort and cross-sectional studies.

**Note:** An Explanation and Elaboration article discusses each checklist item and gives methodological background and published examples of transparent reporting. The STROBE checklist is best used in conjunction with this article (freely available on the Web sites of PLoS Medicine at <http://www.plosmedicine.org/>, Annals of Internal Medicine at <http://www.annals.org/>, and Epidemiology at <http://www.epidem.com/>). Information on the STROBE Initiative is available at [www.strobe-statement.org](http://www.strobe-statement.org).
